# Supplementary material for: Glucose metabolism and smaller hippocampal volume in elderly people with normal cognitive function
Source: PubMed Central journal article supplement — NPJ Aging. 2024 Sep 9;10(1):39. doi: 10.1038/s41514-024-00164-2 (PMC11384785; doi:10.1038/s41514-024-00164-2), 2024-09-09
Supplement: 41514_2024_164_MOESM1_ESM.pdf [file 41514_2024_164_MOESM1_ESM.pdf]

**Supplementary Table 1. Clinical characteristic according to homeostasis model assessment of insulin resistance (HOMA-IR) levels**

| Variables                                                    | HOMA-IR levels (%) |                |                 |
|--------------------------------------------------------------|--------------------|----------------|-----------------|
|                                                              | <1.6               | 1.6-2.4        | ≥2.5            |
| Number of participants                                       | 2,344              | 556            | 197             |
| Age, y                                                       | 71.1 (5.1)         | 71.0 (4.9)     | 71.7 (5.5)      |
| Women, %                                                     | 60.2               | 58.1           | 60.9            |
| <i>ApoE</i> $\epsilon 4$ , present, %                        | 17.4               | 19.8           | 16.2            |
| Hypertension, %                                              | 66.3               | 79.5           | 83.2*           |
| BMI, kg/m <sup>2</sup>                                       | 22.3 (2.7)         | 24.9 (3.3)     | 26.3 (3.3)*     |
| Serum LDL-chol, mg/dL                                        | 122.9 (30.7)       | 121.9 (30.3)   | 116.4 (32.7)    |
| Serum HDL-chol, mg/dL                                        | 67.3 (16.8)        | 58.1 (15.1)    | 54.0 (13.5)*    |
| Education $\leq$ 9 y, %                                      | 20.0               | 23.2           | 22.8            |
| Current smoking habits, %                                    | 7.8                | 7.2            | 8.6             |
| Current alcohol intakes, %                                   | 47.2               | 44.8           | 35.5*           |
| Regular exercise, %                                          | 46.3               | 41.0           | 32.0*           |
| Estimated intracranial volume, $\times 10^3$ mm <sup>3</sup> | 1385.1 (147.7)     | 1373.1 (148.9) | 1365.8 (140.8)* |

Abbreviations: *APOE*, apolipoprotein E; BMI, body mass index; HDL-chol, high-density lipoprotein cholesterol; HOMA- $\beta$ , homeostasis model assessment of beta cell function; LDL-chol, low-density lipoprotein cholesterol

Values were shown as mean values (standard deviations or frequencies).

\* p for trend < 0.05.

**Supplementary Table 2. Clinical characteristic by presence or absence of each risk factors**

|                                                              | Overall           | Age, years        |                   | Gender            |                   | <i>ApoE</i> $\epsilon 4$ , present |                   | Hypertension      |                   | BMI               |                   |
|--------------------------------------------------------------|-------------------|-------------------|-------------------|-------------------|-------------------|------------------------------------|-------------------|-------------------|-------------------|-------------------|-------------------|
|                                                              |                   | <75               | $\geq 75$         | Man               | Woman             | No                                 | Yes               | No                | Yes               | <25.0             | $\geq 25.0$       |
| Number of participants                                       | 7,400             | 5,137             | 2,263             | 3,030             | 4,370             | 5,807                              | 1,202             | 2,015             | 5,268             | 5,265             | 2,019             |
| Age, y                                                       | 72.1<br>(5.6)     | 69.0<br>(2.7)     | 79.2<br>(3.9)     | 71.9<br>(5.5)     | 72.3<br>(5.7)     | 72.3<br>(5.7)                      | 71.3<br>(5.0)     | 70.9<br>(5.0)     | 72.6<br>(5.8)     | 72.2<br>(5.6)     | 71.9<br>(5.5)     |
| Women, %                                                     | 59.1              | 58.5              | 60.3              | -                 | -                 | 59.2                               | 58.9              | 66.0              | 56.5              | 61.3              | 53.6              |
| <i>ApoE</i> $\epsilon 4$ , present, %                        | 17.1              | 18.6              | 13.9              | 17.2              | 17.1              | -                                  | -                 | 17.1              | 17.2              | 17.2              | 17.0              |
| Hypertension, %                                              | 72.3              | 69.0              | 79.8              | 77.0              | 69.1              | 71.9                               | 72.2              | -                 | -                 | 67.9              | 83.4              |
| BMI, kg/m <sup>2</sup>                                       | 23.3<br>(3.3)     | 23.4<br>(3.3)     | 23.3<br>(3.2)     | 23.8<br>(2.9)     | 23.0<br>(3.4)     | 23.3<br>(3.3)                      | 23.3<br>(3.3)     | 22.3<br>(2.9)     | 23.8<br>(3.3)     | 21.8<br>(2.0)     | 27.4<br>(2.3)     |
| Serum LDL-chol, mg/dL                                        | 118.1<br>(30.3)   | 120.3<br>(30.4)   | 113.1<br>(29.5)   | 111.5<br>(29.6)   | 122.7<br>(30.0)   | 117.5<br>(30.3)                    | 121.6<br>(30.9)   | 123.2<br>(30.1)   | 116.1<br>(30.2)   | 119.1<br>(30.5)   | 115.5<br>(29.7)   |
| Serum HDL-chol, mg/dL                                        | 62.9<br>(16.9)    | 63.9<br>(17.3)    | 60.8<br>(15.9)    | 57.9<br>(16.1)    | 66.4<br>(16.6)    | 63.0<br>(17.0)                     | 62.8<br>(16.7)    | 65.2<br>(17.5)    | 62.1 (16.6)       | 65.4<br>(17.4)    | 56.6<br>(14.0)    |
| Education $\leq 9$ y, %                                      | 25.7              | 19.5              | 39.9              | 23.0              | 27.6              | 25.7                               | 22.6              | 19.3              | 27.9              | 24.0              | 29.5              |
| Current smoking habits, %                                    | 8.4               | 10.2              | 4.4               | 17.3              | 2.3               | 8.5                                | 8.0               | 8.3               | 8.4               | 8.7               | 7.7               |
| Current alcohol intakes, %                                   | 44.3              | 48.3              | 35.1              | 71.8              | 25.2              | 44.3                               | 45.4              | 39.7              | 46.0              | 44.2              | 44.6              |
| Regular exercise, %                                          | 43.7              | 43.1              | 45.0              | 44.6              | 43                | 43.6                               | 46.1              | 45.0              | 43.4              | 47.0              | 35.9              |
| Estimated intracranial volume, $\times 10^3$ mm <sup>3</sup> | 1419.2<br>(154.0) | 1418.4<br>(155.7) | 1421.0<br>(149.9) | 1533.2<br>(132.4) | 1340.2<br>(112.9) | 1418.3<br>(154.0)                  | 1421.4<br>(155.4) | 1415.4<br>(150.8) | 1419.8<br>(154.9) | 1409.0<br>(152.6) | 1444.0<br>(155.0) |

**(Continued) Supplementary Table 2. Clinical characteristic by presence or absence of each risk factors**

|                                                                  | Serum LDL-chol    |                   | Serum HDL-chol    |                   | Education         |                   | Current smoking habits |                   | Current alcohol intakes |                   | Regular exercise  |                   | Estimated intracranial volume |                           |
|------------------------------------------------------------------|-------------------|-------------------|-------------------|-------------------|-------------------|-------------------|------------------------|-------------------|-------------------------|-------------------|-------------------|-------------------|-------------------------------|---------------------------|
|                                                                  | <140              | ≥140              | <40               | ≥40               | ≤9 y              | >9 y              | No                     | Yes               | No                      | Yes               | No                | Yes               | <1405.9 × 10 <sup>3</sup>     | ≤1405.9 × 10 <sup>3</sup> |
| Number of participants                                           | 5,552             | 1,638             | 400               | 6,790             | 1,899             | 5,484             | 6,718                  | 617               | 4,089                   | 3,247             | 4,065             | 3,152             | 3,700                         | 3,700                     |
| Age, y                                                           | 72.4<br>(5.7)     | 71.1<br>(5.0)     | 73.1<br>(6.1)     | 72.1<br>(5.6)     | 74.7<br>(6.0)     | 71.2<br>(5.2)     | 72.3<br>(5.7)          | 70.0<br>(4.4)     | 72.8<br>(5.9)           | 71.2<br>(5.1)     | 72.0<br>(5.8)     | 72.3<br>(5.4)     | 72.1<br>(5.6)                 | 72.1<br>(5.6)             |
| Women, %                                                         | 56.0              | 70.2              | 32.3              | 60.8              | 63.3              | 57.5              | 63.0                   | 15.9              | 79.3                    | 33.6              | 59.7              | 58.1              | 85.8                          | 32.3                      |
| <i>ApoE</i> ε4, present, %                                       | 16.3              | 19.9              | 16.5              | 17.2              | 15.4              | 17.7              | 17.2                   | 16.3              | 16.9                    | 17.5              | 16.5              | 18.0              | 16.7                          | 17.6                      |
| Hypertension, %                                                  | 73.6              | 66.9              | 78.6              | 71.7              | 79.1              | 70.0              | 72.3                   | 72.5              | 70.1                    | 75.2              | 72.7              | 71.4              | 71.5                          | 73.2                      |
| BMI, kg/m <sup>2</sup>                                           | 23.4<br>(3.3)     | 23.0<br>(3.0)     | 25.0<br>(3.1)     | 23.2<br>(3.2)     | 23.7<br>(3.3)     | 23.2<br>(3.3)     | 23.4<br>(3.0)          | 23.1<br>(3.1)     | 23.3<br>(3.4)           | 23.4<br>(3.0)     | 23.6<br>(3.4)     | 23.0<br>(3.0)     | 23.0<br>(3.3)                 | 23.7<br>(3.2)             |
| Serum LDL-chol, mg/dL                                            | 158.9<br>(20.9)   | 159.7<br>(18.0)   | 107.0<br>(32.7)   | 118.8<br>(30.1)   | 114.2<br>(29.8)   | 119.4<br>(30.4)   | 118.8<br>(30.3)        | 110.9<br>(30.0)   | 120.4<br>(30.0)         | 115.2<br>(30.6)   | 117.1<br>(30.8)   | 119.4<br>(29.6)   | 121.4<br>(30.2)               | 114.8<br>(30.1)           |
| Serum HDL-chol, mg/dL                                            | 62.4<br>(17.0)    | 64.7<br>(16.7)    | 34.9<br>(3.7)     | 64.6<br>(16.0)    | 61.0<br>(16.1)    | 63.6<br>(17.2)    | 63.4<br>(16.8)         | 57.9<br>(17.3)    | 62.4<br>(16.5)          | 63.6<br>(17.5)    | 61.6<br>(16.4)    | 64.6<br>(17.5)    | 65.8<br>(16.8)                | 60.0<br>(16.5)            |
| Education ≤9 y, %                                                | 26.3              | 21.6              | 31.3              | 24.9              | -                 | -                 | 26.0                   | 21.6              | 28.7                    | 21.9              | 28.3              | 21.5              | 28.6                          | 22.8                      |
| Current smoking habits, %                                        | 9.2               | 5.6               | 15.9              | 8.0               | 7.1               | 8.9               | -                      | -                 | 4.5                     | 13.4              | 10.1              | 6.3               | 4.2                           | 12.7                      |
| Current alcohol intakes, %                                       | 46.1              | 38.6              | 38.3              | 44.7              | 37.7              | 46.6              | 41.9                   | 70.5              | -                       | -                 | 42.2              | 47.1              | 32.1                          | 56.5                      |
| Regular exercise, %                                              | 43.6              | 45.2              | 36.8              | 44.4              | 37.0              | 45.9              | 44.8                   | 32.9              | 41.6                    | 46.5              | -                 | -                 | 43.9                          | 43.4                      |
| Estimated intracranial volume, × 10 <sup>3</sup> mm <sup>3</sup> | 1426.4<br>(154.6) | 1390.3<br>(148.6) | 1472.2<br>(156.3) | 1415.0<br>(153.2) | 1400.0<br>(152.9) | 1425.9<br>(153.9) | 1410.8<br>(151.5)      | 1506.0<br>(154.0) | 1379.9<br>(140.1)       | 1467.5<br>(156.7) | 1419.5<br>(154.3) | 1417.8<br>(153.6) | -                             | -                         |

---

Abbreviations: *APOE*, apolipoprotein E; BMI, body mass index; HDL-chol, high-density lipoprotein cholesterol; LDL-chol, low-density lipoprotein cholesterol

Values were shown as mean values (standard deviations) or frequencies.

Classification of estimated intracranial volume used median values.

**Supplementary Table 3. Multivariable-adjusted mean values of the volumes of the hippocampus and hippocampal subregions according to hemoglobinA<sub>1c</sub> levels among non-diabetic participants**

|                                          | Hemoglobin A <sub>1c</sub> levels, % |                                 |               | p for trend | q-value of FDR correction |
|------------------------------------------|--------------------------------------|---------------------------------|---------------|-------------|---------------------------|
|                                          | <5.7<br>(n=3,187)                    | 5.7-6.4<br>(n=2,546)            | ≥6.5<br>(n=0) |             |                           |
| Whole hippocampus, HV, mm <sup>3</sup>   | 6187.947<br>(6140.402-6235.493)      | 6198.326<br>(6149.158-6247.495) | -             | 0.458       | -                         |
| <b><i>Hippocampal subregions</i></b>     |                                      |                                 |               |             |                           |
| HATA, HV, mm <sup>3</sup>                | 97.034<br>(95.637-98.431)            | 96.796<br>(95.325-98.214)       | -             | 0.520       | 0.624                     |
| Fimbria, HV, mm <sup>3</sup>             | 102.607<br>(99.631-105.583)          | 100.548<br>(97.470-103.625)     | -             | 0.019*      | 0.114                     |
| Hippocampal fissure, HV, mm <sup>3</sup> | 346.067<br>(341.602-350.533)         | 348.317<br>(343.699-352.935)    | -             | 0.087       | 0.261                     |
| Molecular_layer, HV, mm <sup>3</sup>     | 802.592<br>(794.998-810.186)         | 804.343<br>(796.490-812.196)    | -             | 0.443       | 0.590                     |
| GC ML DG, HV, mm <sup>3</sup>            | 541.076<br>(536.202-545.949)         | 541.503<br>(536.463-546.543)    | -             | 0.765       | 0.765                     |
| CA1, HV, mm <sup>3</sup>                 | 1213.239<br>(1201.965-1224.514)      | 1215.816<br>(1204.157-1227.476) | -             | 0.437       | 0.655                     |
| CA3, HV, mm <sup>3</sup>                 | 397.849<br>(393.234-402.465)         | 400.155<br>(395.382-404.927)    | -             | 0.089       | 0.213                     |
| CA4, HV, mm <sup>3</sup>                 | 478.363<br>(474.107-482.620)         | 479.565<br>(475.163-483.966)    | -             | 0.337       | 0.577                     |
| Subiculum, HV, mm <sup>3</sup>           | 838.946<br>(831.122-846.771)         | 837.896<br>(829.804-845.988)    | -             | 0.648       | 0.706                     |
| Presubiculum, HV, mm <sup>3</sup>        | 560.948<br>(554.680-567.215)         | 558.687<br>(552.206-565.169)    | -             | 0.220       | 0.440                     |
| Parasubiculum, HV, mm <sup>3</sup>       | 109.728<br>(107.445-112.011)         | 108.462<br>(106.101-110.822)    | -             | 0.059       | 0.236                     |
| Hippocampal tail, HV, mm <sup>3</sup>    | 1045.565<br>(1033.637-1057.493)      | 1054.582<br>(1042.247-1066.917) | -             | 0.010*      | 0.120                     |

Abbreviations: CA, Cornu Ammonis; eTIV, estimated intracranial volume; FDR, false discovery rate; GC ML DG, granule cell and molecular cell layer of the dentate gyrus; HATA, hippocampus amygdala transition area; HOMA-β, homeostasis model assessment of percent beta cell function; HV, hippocampal volume.

Values are shown as multivariable-adjusted mean values (95% confidence intervals), where values are calculated as follows: (left + right) volumes of hippocampus

---

or hippocampal subregions.

Adjusted for age, sex, educational level, research site, apolipoprotein E  $\epsilon 4$ , body mass index, hypertension, serum low-density lipoprotein cholesterol, serum high-density lipoprotein cholesterol, current smoking habits, current alcohol intakes, regular exercise, eTIV. \* p for trend < 0.05. † q-value of FDR correction < 0.05.

**Supplementary Table 4. Multivariable-adjusted mean values of the volumes of the hippocampus and hippocampal subregions according to serum glycated albumin levels among non-diabetic participants**

|                                          | Serum glycated albumin levels, % |                                 |                                 |                                 | p for trend | q-value of FDR correction |
|------------------------------------------|----------------------------------|---------------------------------|---------------------------------|---------------------------------|-------------|---------------------------|
|                                          | <13.9<br>(n=1,626)               | 13.9-14.8<br>(n=1,706)          | 14.9-16.0<br>(n=1,578)          | ≥16.1<br>(n=768)                |             |                           |
| Whole hippocampus, HV, mm <sup>3</sup>   | 6181.675<br>(6129.961-6233.389)  | 6185.163<br>(6133.511-6236.816) | 6199.915<br>(6147.757-6252.073) | 6167.791<br>(6109.583-6225.999) | 0.527       | -                         |
| <b><i>Hippocampal subregions</i></b>     |                                  |                                 |                                 |                                 |             |                           |
| HATA, HV, mm <sup>3</sup>                | 97.498<br>(95.938-99.058)        | 97.795<br>(96.203-99.315)       | 97.954<br>(96.383-99.524)       | 97.534<br>(95.783-99.286)       | 0.854       | 0.854                     |
| Fimbria, HV, mm <sup>3</sup>             | 103.050<br>(99.818-106.281)      | 102.798<br>(99.570-106.026)     | 101.883<br>(98.624-105.142)     | 97.859<br>(94.221-101.496)      | 0.003*      | 0.036 <sup>†</sup>        |
| Hippocampal fissure, HV, mm <sup>3</sup> | 344.258<br>(339.429-349.087)     | 343.663<br>(338.840-348.486)    | 346.717<br>(341.847-351.588)    | 347.948<br>(342.512-353.383)    | 0.120       | 0.480                     |
| Molecular_layer, HV, mm <sup>3</sup>     | 804.181<br>(795.920-812.443)     | 803.830<br>(795.579-812.082)    | 801.184<br>(792.851-809.516)    | 800.836<br>(791.537-810.165)    | 0.664       | 0.796                     |
| GC ML DG, HV, mm <sup>3</sup>            | 540.910<br>(535.610-546.210)     | 540.711<br>(535.418-546.005)    | 542.532<br>(537.187-547.877)    | 537.094<br>(531.129-543.060)    | 0.145       | 0.435                     |
| CA1, HV, mm <sup>3</sup>                 | 1213.256<br>(1200.983-1225.528)  | 1211.417<br>(1199.159-1223.675) | 1215.496<br>(1203.118-1227.874) | 1209.176<br>(1195.362-1222.989) | 0.642       | 0.856                     |
| CA3, HV, mm <sup>3</sup>                 | 397.123<br>(392.103-402.143)     | 398.255<br>(393.241-403.270)    | 400.307<br>(395.244-405.370)    | 397.380<br>(391.729-403.031)    | 0.311       | 0.622                     |
| CA4, HV, mm <sup>3</sup>                 | 477.785<br>(473.155-482.414)     | 477.945<br>(473.321-482.569)    | 480.209<br>(475.540-484.878)    | 476.441<br>(471.234-481.652)    | 0.236       | 0.566                     |
| Subiculum, HV, mm <sup>3</sup>           | 838.860<br>(830.346-847.374)     | 837.846<br>(829.342-846.349)    | 839.414<br>(830.827-848.001)    | 833.474<br>(823.891-843.057)    | 0.445       | 0.762                     |
| Presubiculum, HV, mm <sup>3</sup>        | 560.102<br>(553.288-566.917)     | 558.638<br>(551.832-565.444)    | 560.379<br>(553.507-567.252)    | 557.416<br>(549.746-565.086)    | 0.721       | 0.786                     |
| Parasubiculum, HV, mm <sup>3</sup>       | 109.527<br>(107.047-112.007)     | 108.915<br>(106.438-111.393)    | 109.283<br>(106.782-111.785)    | 107.893<br>(105.102-110.685)    | 0.514       | 0.771                     |
| Hippocampal tail, HV, mm <sup>3</sup>    | 1039.885<br>(1026.916-1052.855)  | 1047.827<br>(1034.873-1060.781) | 1052.215<br>(1039.135-1065.296) | 1053.881<br>(1039.283-1068.479) | 0.038*      | 0.228                     |

Abbreviations: CA, Cornu Ammonis; eTIV, estimated intracranial volume; FDR, false discovery rate; GC ML DG, granule cell and molecular cell layer of the dentate gyrus; HATA, hippocampus amygdala transition area; HV, hippocampal volume.

Values are shown as multivariable-adjusted mean values (95% confidence intervals), where values are calculated as follows: (left + right) volumes of hippocampus or hippocampal subregions.

---

Adjusted for age, sex, educational level, research site, apolipoprotein E  $\epsilon 4$ , body mass index, hypertension, serum low-density lipoprotein cholesterol, serum high-density lipoprotein cholesterol, current smoking habits, current alcohol intakes, regular exercise, eTIV. \* p for trend < 0.05. † q-value of FDR correction < 0.05.



**Supplementary Table 5. Multivariable-adjusted mean values of the volumes of the hippocampus and hippocampal subregions according to homeostasis model assessment of beta cell function (HOMA-β) levels among non-diabetic participants**

|                                          | HOMA-β levels, %             |                              | p for trend | q-value of FDR correction |
|------------------------------------------|------------------------------|------------------------------|-------------|---------------------------|
|                                          | ≤30<br>(n=139)               | >30<br>(n=2,579)             |             |                           |
| Whole hippocampus, HV, mm <sup>3</sup>   | 6106.078 (5988.242-6223.913) | 6206.146 (6123.606-6288.685) | 0.031*      | -                         |
| <b><i>Hippocampal subregions</i></b>     |                              |                              |             |                           |
| HATA, HV, mm <sup>3</sup>                | 94.122 (91.160-97.882)       | 95.122 (92.768-97.477)       | 0.650       | 0.709                     |
| Fimbria, HV, mm <sup>3</sup>             | 99.601 (92.103-107.098)      | 108.196 (102.944-113.448)    | 0.004*      | 0.048†                    |
| Hippocampal fissure, HV, mm <sup>3</sup> | 336.790 (325.836-347.744)    | 334.559 (326.886-342.232)    | 0.605       | 0.726                     |
| Molecular_layer, HV, mm <sup>3</sup>     | 864.716 (845.627-883.805)    | 880.295 (866.924-893.666)    | 0.038*      | 0.152                     |
| GC ML DG, HV, mm <sup>3</sup>            | 526.973 (515.260-538.686)    | 534.692 (526.487-542.896)    | 0.017*      | 0.102                     |
| CA1, HV, mm <sup>3</sup>                 | 1180.405 (1152.537-1208.273) | 1195.335 (1175.814-1214.855) | 0.174       | 0.261                     |
| CA3, HV, mm <sup>3</sup>                 | 393.128 (381.787-404.468)    | 396.257 (388.313-404.200)    | 0.484       | 0.645                     |
| CA4, HV, mm <sup>3</sup>                 | 465.390 (455.202-475.578)    | 471.058 (463.922-478.194)    | 0.158       | 0.316                     |
| Subiculum, HV, mm <sup>3</sup>           | 807.831 (788.866-826.797)    | 823.361 (810.076-836.646)    | 0.038*      | 0.152                     |
| Presubiculum, HV, mm <sup>3</sup>        | 537.608 (522.698-552.517)    | 545.632 (535.188-556.075)    | 0.172       | 0.294                     |
| Parasubiculum, HV, mm <sup>3</sup>       | 109.124 (103.634-114.614)    | 109.923 (106.078-113.769)    | 0.712       | 0.712                     |
| Hippocampal tail, HV, mm <sup>3</sup>    | 1026.781 (996.690-1056.873)  | 1046.275 (1025.197-1067.353) | 0.100       | 0.240                     |

Abbreviations: CA, Cornu Ammonis; eTIV, estimated intracranial volume; FDR, false discovery rate; GC ML DG, granule cell and molecular cell layer of the dentate gyrus; HATA, hippocampus amygdala transition area; HOMA-β, homeostasis model assessment of beta cell function; HV, hippocampal volume.

Values are shown as multivariable-adjusted mean values (95% confidence intervals), where values are calculated as follows: (left + right) volumes of hippocampus or hippocampal subregions.

Adjusted for age, sex, educational level, research site, apolipoprotein E ε4, body mass index, hypertension, serum low-density lipoprotein cholesterol, serum high-density lipoprotein cholesterol, current smoking habits, current alcohol intakes, regular exercise, eTIV. \* p for trend < 0.05. † q-value of FDR correction < 0.05.

**Supplementary Table 6. Multivariable-adjusted mean values of the volumes of the hippocampus and hippocampal subregions according to homeostasis model assessment of insulin resistance (HOMA-IR) levels**

|                                          | HOMA-IR levels, %               |                                 |                                 | p for trend | q-value of FDR correction |
|------------------------------------------|---------------------------------|---------------------------------|---------------------------------|-------------|---------------------------|
|                                          | <1.6<br>(n=2,344)               | 1.6-2.4<br>(n=556)              | ≥2.5<br>(n=197)                 |             |                           |
| Whole hippocampus, HV, mm <sup>3</sup>   | 6204.847<br>(6128.106-6281.588) | 6175.624<br>(6087.439-6263.809) | 6159.157<br>(6051.619-6266.695) | 0.378       | -                         |
| <b><i>Hippocampal subregions</i></b>     |                                 |                                 |                                 |             |                           |
| HATA, HV, mm <sup>3</sup>                | 95.357<br>(93.166-97.547)       | 94.692<br>(92.175-97.209)       | 94.981<br>(91.911-98.050)       | 0.673       | 1.009                     |
| Fimbria, HV, mm <sup>3</sup>             | 107.462<br>(102.530-112.395)    | 107.443<br>(101.775-113.111)    | 105.801<br>(98.889-112.713)     | 0.821       | 0.985                     |
| Hippocampal fissure, HV, mm <sup>3</sup> | 338.230<br>(331.071-345.390)    | 336.653<br>(328.426-344.880)    | 334.242<br>(324.209-344.275)    | 0.549       | 1.098                     |
| Molecular_layer, HV, mm <sup>3</sup>     | 880.071<br>(867.609-892.532)    | 874.931<br>(860.610-889.251)    | 873.615<br>(856.152-891.078)    | 0.386       | 2.316                     |
| GC ML DG, HV, mm <sup>3</sup>            | 534.773<br>(527.124-542.421)    | 533.070<br>(524.281-541.860)    | 530.922<br>(520.204-541.640)    | 0.595       | 1.020                     |
| CA1, HV, mm <sup>3</sup>                 | 1197.294<br>(1179.159-1215.429) | 1190.461<br>(1169.622-1211.301) | 1195.738<br>(1170.325-1221.151) | 0.545       | 1.308                     |
| CA3, HV, mm <sup>3</sup>                 | 395.261<br>(387.885-402.636)    | 394.583<br>(386.108-403.058)    | 391.951<br>(381.616-402.286)    | 0.714       | 0.952                     |
| CA4, HV, mm <sup>3</sup>                 | 0.0339 (0.0334-0.0344)          | 0.0341 (0.0335-0.0347)          | 0.0341 (0.0334-0.0348)          | 0.527       | 1.581                     |
| Subiculum, HV, mm <sup>3</sup>           | 825.931<br>(813.633-838.228)    | 819.421<br>(805.289-833.553)    | 810.004<br>(792.771-827.237)    | 0.037*      | 0.444                     |
| Presubiculum, HV, mm <sup>3</sup>        | 546.029<br>(536.393-555.666)    | 544.127<br>(533.053-555.201)    | 539.109<br>(525.605-552.614)    | 0.410       | 1.640                     |
| Parasubiculum, HV, mm <sup>3</sup>       | 109.213<br>(105.632-112.794)    | 108.617<br>(104.502-112.732)    | 108.321<br>(103.303-113.340)    | 0.837       | 0.913                     |
| Hippocampal tail, HV, mm <sup>3</sup>    | 1042.290<br>(1022.628-1061.953) | 1038.961<br>(1016.366-1061.556) | 1041.664<br>(1014.110-1069.218) | 0.884       | 0.884                     |

Abbreviations: CA, Cornu Ammonis; eTIV, estimated intracranial volume; FDR, false discovery rate; GC ML DG, granule cell and molecular cell layer of the dentate gyrus; HATA, hippocampus amygdala transition area; HOMA-IR, homeostasis model assessment of insulin resistance; HV, hippocampal volume.

Values are shown as multivariable-adjusted mean values (95% confidence intervals), where values are calculated as follows: (left + right) volumes of hippocampus or hippocampal subregions.

---

Adjusted for age, sex, educational level, research site, apolipoprotein E  $\epsilon 4$ , body mass index, hypertension, serum low-density lipoprotein cholesterol, serum high-density lipoprotein cholesterol, current smoking habits, current alcohol intakes, regular exercise, eTIV. \* p for trend < 0.05. † q-value of FDR correction < 0.05.

**Supplementary Table 7. Multivariable-adjusted mean values of the volumes of the hippocampus and hippocampal subregions according to homeostasis model assessment of insulin resistance (HOMA-IR) levels among non-diabetic participants**

|                                          | HOMA-IR levels, %               |                                 |                                 | p for trend | q-value of FDR correction |
|------------------------------------------|---------------------------------|---------------------------------|---------------------------------|-------------|---------------------------|
|                                          | <1.6<br>(n=2,140)               | 1.6-2.4<br>(n=451)              | ≥2.5<br>(n=127)                 |             |                           |
| Whole hippocampus, HV, mm <sup>3</sup>   | 6206.000<br>(6123.148-6288.852) | 6165.340<br>(6069.715-6260.964) | 6162.896<br>(6037.719-6288.019) | 0.312       | -                         |
| <b><i>Hippocampal subregions</i></b>     |                                 |                                 |                                 |             |                           |
| HATA, HV, mm <sup>3</sup>                | 95.235<br>(92.873-97.597)       | 94.623<br>(91.897-97.348)       | 93.608<br>(90.041-97.176)       | 0.465       | 0.697                     |
| Fimbria, HV, mm <sup>3</sup>             | 107.815<br>(102.538-113.091)    | 107.172<br>(101.082-113.262)    | 104.414<br>(96.444-112.385)     | 0.574       | 0.688                     |
| Hippocampal fissure, HV, mm <sup>3</sup> | 334.875<br>(327.176-342.574)    | 333.747<br>(324.861-342.632)    | 334.629<br>(323.000-346.258)    | 0.914       | 0.914                     |
| Molecular_layer, HV, mm <sup>3</sup>     | 880.415<br>(866.995-893.835)    | 873.282<br>(857.793-888.770)    | 872.832<br>(852.562-893.103)    | 0.255       | 1.020                     |
| GC ML DG, HV, mm <sup>3</sup>            | 534.749<br>(526.516-542.983)    | 531.766<br>(522.263-541.269)    | 529.660<br>(517.223-542.097)    | 0.418       | 0.716                     |
| CA1, HV, mm <sup>3</sup>                 | 1195.587<br>(1176.002-1215.172) | 1185.924<br>(1163.319-1208.528) | 1192.612<br>(1163.029-1222.196) | 0.364       | 0.728                     |
| CA3, HV, mm <sup>3</sup>                 | 396.301<br>(388.330-404.271)    | 394.632<br>(385.433-403.831)    | 394.969<br>(382.929-407.008)    | 0.824       | 0.898                     |
| CA4, HV, mm <sup>3</sup>                 | 471.255<br>(464.095-478.415)    | 468.151<br>(459.887-476.414)    | 466.690<br>(455.875-477.505)    | 0.333       | 0.999                     |
| Subiculum, HV, mm <sup>3</sup>           | 823.884<br>(810.556-837.212)    | 816.670<br>(801.288-832.053)    | 808.480<br>(788.348-828.611)    | 0.083       | 0.996                     |
| Presubiculum, HV, mm <sup>3</sup>        | 545.818<br>(535.340-556.296)    | 543.212<br>(531.119-555.305)    | 536.754<br>(520.927-552.582)    | 0.339       | 0.813                     |
| Parasubiculum, HV, mm <sup>3</sup>       | 110.248<br>(106.932-114.103)    | 108.785<br>(104.434-113.235)    | 106.200<br>(100.376-112.025)    | 0.175       | 1.050                     |
| Hippocampal tail, HV, mm <sup>3</sup>    | 1044.694<br>(1023.540-1065.848) | 1014.124<br>(1016.709-1065.539) | 1056.647<br>(1024.694-1088.601) | 0.523       | 0.697                     |

Abbreviations: CA, Cornu Ammonis; eTIV, estimated intracranial volume; FDR, false discovery rate; GC ML DG, granule cell and molecular cell layer of the dentate gyrus; HATA, hippocampus amygdala transition area; HOMA-IR, homeostasis model assessment of insulin resistance; HV, hippocampal volume.

Values are shown as multivariable-adjusted mean values (95% confidence intervals), where values are calculated as follows: (left + right) volumes of hippocampus

---

or hippocampal subregions.

Adjusted for age, sex, educational level, research site, apolipoprotein E  $\epsilon 4$ , body mass index, hypertension, serum low-density lipoprotein cholesterol, serum high-density lipoprotein cholesterol, current smoking habits, current alcohol intakes, regular exercise, eTIV. \* p for trend < 0.05. † q-value of FDR correction < 0.05.

**Supplementary Table 8. Multiple linear-regression analysis about hemoglobinA<sub>1c</sub> levels**

|                                      | B        | SE B   | t       | p for trend | q-value of FDR correction |
|--------------------------------------|----------|--------|---------|-------------|---------------------------|
| Whole hippocampus                    | - 41.486 | 10.030 | - 4.136 | <0.01*      | -                         |
| <b><i>Hippocampal subregions</i></b> |          |        |         |             |                           |
| HATA                                 | - 0.918  | 0.293  | - 3.131 | 0.002*      | 0.004†                    |
| Fimbria                              | - 4.834  | 0.629  | - 7.689 | <0.001*     | <0.001†                   |
| Hippocampal fissure                  | 1.059    | 0.948  | 1.117   | 0.264       | 0.264                     |
| Molecular_layer                      | - 3.956  | 1.604  | - 2.467 | 0.014*      | 0.024†                    |
| GC ML DG                             | - 3.851  | 1.034  | - 3.726 | <0.001*     | <0.001†                   |
| CA1                                  | - 6.572  | 2.376  | - 2.766 | 0.006*      | 0.012†                    |
| CA3                                  | - 1.573  | 0.979  | - 1.607 | 0.108       | 0.144                     |
| CA4                                  | - 2.192  | 0.903  | - 2.427 | 0.015*      | 0.022†                    |
| Subiculum                            | - 8.117  | 1.646  | - 4.933 | <0.001*     | <0.001†                   |
| Presubiculum                         | - 5.411  | 1.312  | - 4.124 | <0.001*     | <0.001†                   |
| Parasubiculum                        | - 0.578  | 0.481  | - 1.201 | 0.230       | 0.250                     |
| Hippocampal tail                     | - 3.484  | 2.517  | - 1.384 | 0.166       | 0.199                     |

Abbreviations: B, partial regression coefficient; CA, Cornu Ammonis; eTIV, estimated intracranial volume; FDR, false discovery rate; GC ML DG, granule cell and molecular cell layer of the dentate gyrus; HATA, hippocampus amygdala transition area; HOMA- $\beta$ , homeostasis model assessment of beta cell function; HV, hippocampal volume; SE, standard error.

Adjusted for age, sex, educational level, research site, apolipoprotein E  $\epsilon 4$ , body mass index, hypertension, serum low-density lipoprotein cholesterol, serum high-density lipoprotein cholesterol, current smoking habits, current alcohol intakes, regular exercise, eTIV.

\* p value < 0.05. † q-value of FDR correction < 0.05.

**Supplementary Table 9. Multiple linear-regression analysis about glycated albumin levels**

|                                      | B        | SE B  | t       | p for trend | q-value of FDR correction |
|--------------------------------------|----------|-------|---------|-------------|---------------------------|
| Whole hippocampus                    | - 11.831 | 2.638 | - 4.485 | <0.001*     | -                         |
| <b><i>Hippocampal subregions</i></b> |          |       |         |             |                           |
| HATA                                 | - 0.324  | 0.077 | - 4.214 | <0.001*     | <0.001†                   |
| Fimbria                              | - 1.405  | 0.165 | - 8.512 | <0.001*     | <0.001†                   |
| Hippocampal fissure                  | 0.388    | 0.248 | 1.563   | 0.118       | 0.141                     |
| Molecular_layer                      | - 1.428  | 0.422 | - 3.386 | <0.001*     | 0.001†                    |
| GC ML DG                             | - 1.378  | 0.272 | - 5.074 | <0.001*     | <0.001†                   |
| CA1                                  | - 1.905  | 0.625 | - 3.046 | 0.002*      | 0.003†                    |
| CA3                                  | -0.713   | 0.257 | - 2.771 | 0.006*      | 0.008†                    |
| CA4                                  | - 0.820  | 0.237 | - 3.453 | <0.001*     | 0.001†                    |
| Subiculum                            | - 2.156  | 0.433 | - 4.979 | <0.001*     | <0.001†                   |
| Presubiculum                         | - 1.305  | 0.345 | - 3.781 | <0.001*     | <0.001†                   |
| Parasubiculum                        | - 0.135  | 0.126 | - 1.070 | 0.284       | 0.309                     |
| Hippocampal tail                     | - 0.260  | 0.662 | - 0.393 | 0.694       | 0.694                     |

Abbreviations: B, partial regression coefficient; CA, Cornu Ammonis; eTIV, estimated intracranial volume; FDR, false discovery rate; GC ML DG, granule cell and molecular cell layer of the dentate gyrus; HATA, hippocampus amygdala transition area; HOMA- $\beta$ , homeostasis model assessment of beta cell function; HV, hippocampal volume; SE, standard error.

Adjusted for age, sex, educational level, research site, apolipoprotein E  $\epsilon 4$ , body mass index, hypertension, serum low-density lipoprotein cholesterol, serum high-density lipoprotein cholesterol, current smoking habits, current alcohol intakes, regular exercise, eTIV.

\* p value < 0.05. † q-value of FDR correction < 0.05.

**Supplementary Table 10. Multiple linear-regression analysis about logarithmic transform of homeostasis model assessment of  $\beta$  cell function (HOMA- $\beta$ ) levels**

|                               | B       | SE B   | t     | p for trend | q-value of FDR correction |
|-------------------------------|---------|--------|-------|-------------|---------------------------|
| Whole hippocampus             | 104.942 | 42.957 | 2.443 | 0.015*      | -                         |
| <i>Hippocampal subregions</i> |         |        |       |             |                           |
| HATA                          | 0.904   | 1.227  | 0.736 | 0.462       | 0.554                     |
| Fimbria                       | 8.499   | 2.759  | 3.081 | 0.002*      | 0.024 <sup>†</sup>        |
| Hippocampal fissure           | 0.544   | 4.011  | 0.136 | 0.892       | 0.892                     |
| Molecular_layer               | 10.210  | 6.980  | 1.463 | 0.144       | 0.216                     |
| GC ML DG                      | 8.811   | 4.282  | 2.058 | 0.040*      | 0.120                     |
| CA1                           | 21.308  | 10.153 | 2.099 | 0.036*      | 0.144                     |
| CA3                           | 3.879   | 4.131  | 0.939 | 0.348       | 0.464                     |
| CA4                           | 5.824   | 3.725  | 1.564 | 0.118       | 0.202                     |
| Subiculum                     | 11.952  | 6.893  | 1.734 | 0.083       | 0.199                     |
| Presubiculum                  | 9.093   | 5.397  | 1.685 | 0.092       | 0.184                     |
| Parasubiculum                 | 1.283   | 2.006  | 0.640 | 0.522       | 0.569                     |
| Hippocampal tail              | 23.178  | 11.006 | 2.106 | 0.035*      | 0.210                     |

Abbreviations: B, partial regression coefficient; CA, Cornu Ammonis; eTIV, estimated intracranial volume; FDR, false discovery rate; GC ML DG, granule cell and molecular cell layer of the dentate gyrus; HATA, hippocampus amygdala transition area; HOMA- $\beta$ , homeostasis model assessment of beta cell function; HV, hippocampal volume; SE, standard error.

Adjusted for age, sex, educational level, research site, apolipoprotein E  $\epsilon 4$ , body mass index, hypertension, serum low-density lipoprotein cholesterol, serum high-density lipoprotein cholesterol, current smoking habits, current alcohol intakes, regular exercise, eTIV.

\* p value < 0.05. <sup>†</sup> q-value of FDR correction < 0.05.



**Supplementary Table 11. Multiple linear-regression analysis about logarithmic transform of homeostasis model assessment of insulin resistance (HOMA-IR) levels**

|                               | B       | SE B   | t      | p for trend | q-value of FDR correction |
|-------------------------------|---------|--------|--------|-------------|---------------------------|
| Whole hippocampus             | -13.698 | 47.748 | -0.278 | 0.774       | -                         |
| <i>Hippocampal subregions</i> |         |        |        |             |                           |
| HATA                          | -1.400  | 1.362  | -1.027 | 0.304       | 3.648                     |
| Fimbria                       | 0.161   | 3.068  | 0.052  | 0.958       | 0.958                     |
| Hippocampal fissure           | 1.149   | 4.454  | 0.258  | 0.796       | 1.364                     |
| Molecular_layer               | -4.218  | 7.753  | -0.544 | 0.586       | 2.344                     |
| GC ML DG                      | -1.592  | 4.758  | -0.334 | 0.738       | 1.771                     |
| CA1                           | -1.821  | 11.282 | -0.161 | 0.872       | 1.046                     |
| CA3                           | 1.140   | 4.588  | 0.249  | 0.804       | 1.206                     |
| CA4                           | -1.828  | 4.138  | -0.442 | 0.659       | 1.977                     |
| Subiculum                     | -7.083  | 7.657  | -0.925 | 0.335       | 2.010                     |
| Presubiculum                  | -0.909  | 5.996  | -0.152 | 0.879       | 0.958                     |
| Parasubiculum                 | 0.408   | 2.228  | 0.183  | 0.855       | 1.140                     |
| Hippocampal tail              | 3.443   | 12.231 | -0.282 | 0.778       | 1.556                     |

Abbreviations: B, partial regression coefficient; CA, Cornu Ammonis; eTIV, estimated intracranial volume; FDR, false discovery rate; GC ML DG, granule cell and molecular cell layer of the dentate gyrus; HATA, hippocampus amygdala transition area; HOMA- $\beta$ , homeostasis model assessment of beta cell function; HV, hippocampal volume; SE, standard error.

Adjusted for age, sex, educational level, research site, apolipoprotein E  $\epsilon 4$ , body mass index, hypertension, serum low-density lipoprotein cholesterol, serum high-density lipoprotein cholesterol, current smoking habits, current alcohol intakes, regular exercise, eTIV.

\* p value < 0.05. † q-value of FDR correction < 0.05.

**Supplementary Table 12. Multivariable-adjusted mean values of the volumes of the hippocampus and hippocampal subfields by age according to hemoglobinA<sub>1c</sub> levels**

|                                           | <75 years old, hemoglobin A <sub>1c</sub> levels, % |                                 |                                 | <75 years old<br>p for trend | <75 years old<br>q-value of FDR<br>correction |
|-------------------------------------------|-----------------------------------------------------|---------------------------------|---------------------------------|------------------------------|-----------------------------------------------|
|                                           | <5.7<br>(n=2,376)                                   | 5.7-6.4<br>(n=2,074)            | ≥6.5<br>(n=542)                 |                              |                                               |
| Whole hippocampus,<br>HV, mm <sup>3</sup> | 6240.568<br>(6145.144-6335.992)                     | 6258.864<br>(6163.400-6354.327) | 6166.923<br>(6064.911-6268.935) | 0.002*                       | -                                             |
| <b><i>Hippocampal subregions</i></b>      |                                                     |                                 |                                 |                              |                                               |
| HATA, HV, mm <sup>3</sup>                 | 98.396<br>(95.624-101.168)                          | 98.182<br>(95.408-100.956)      | 96.584<br>(93.621-99.548)       | 0.056                        | 0.084                                         |
| Fimbria, HV, mm <sup>3</sup>              | 107.567<br>(101.565-113.570)                        | 104.620<br>(98.615-110.625)     | 98.651<br>(92.234-105.068)      | <0.001*                      | <0.001 <sup>†</sup>                           |
| Hippocampal fissure, HV, mm <sup>3</sup>  | 348.677<br>(339.847-357.508)                        | 351.965<br>(343.131-360.799)    | 352.303<br>(342.862-361.743)    | 0.067                        | 0.089                                         |
| Molecular_layer, HV, mm <sup>3</sup>      | 813.880<br>(798.798-828.962)                        | 816.156<br>(801.068-831.244)    | 805.492<br>(789.368-821.615)    | 0.034*                       | 0.081                                         |
| GC ML DG, HV, mm <sup>3</sup>             | 544.462<br>(534.753-554.171)                        | 545.911<br>(536.198-555.624)    | 539.293<br>(528.914-549.672)    | 0.043*                       | 0.086                                         |
| CA1, HV, mm <sup>3</sup>                  | 1222.191<br>(1199.391-1244.992)                     | 1228.272<br>(1205.462-1251.081) | 1213.866<br>(1189.492-1238.241) | 0.045*                       | 0.077                                         |
| CA3, HV, mm <sup>3</sup>                  | 399.636<br>(390.390-408.881)                        | 402.922<br>(393.673-412.171)    | 399.523<br>(389.639-409.406)    | 0.087                        | 0.104                                         |
| CA4, HV, mm <sup>3</sup>                  | 481.002<br>(472.569-489.435)                        | 483.145<br>(474.709-491.581)    | 479.066<br>(470.051-488.082)    | 0.125                        | 0.125                                         |
| Subiculum, HV, mm <sup>3</sup>            | 847.014<br>(831.444-862.584)                        | 845.920<br>(830.343-861.496)    | 829.503<br>(812.858-846.148)    | <0.001*                      | <0.001 <sup>†</sup>                           |
| Presubiculum, HV, mm <sup>3</sup>         | 563.940<br>(551.620-576.261)                        | 560.303<br>(547.977-572.629)    | 551.044<br>(537.873-564.215)    | <0.001*                      | 0.002 <sup>†</sup>                            |
| Parasubiculum, HV, mm <sup>3</sup>        | 109.007<br>(104.679-113.335)                        | 107.511<br>(103.181-111.841)    | 107.299<br>(102.671-111.926)    | 0.093                        | 0.101                                         |
| Hippocampal tail, HV, mm <sup>3</sup>     | 1053.472<br>(1028.916-1078.028)                     | 1065.921<br>(1014.356-1090.487) | 1046.603<br>(1020.351-1072.854) | 0.001*                       | 0.003 <sup>†</sup>                            |

**(Continued) Supplementary Table 12. Multivariable-adjusted mean values of the volumes of the hippocampus and hippocampal subfields by age according to hemoglobinA<sub>1c</sub> levels**

|                                           | ≥75 years old, hemoglobin A <sub>1c</sub> levels, % |                                 |                                 | ≥75 years old<br>p for trend | ≥75 years old<br>q-value of FDR<br>correction | P for<br>interaction |
|-------------------------------------------|-----------------------------------------------------|---------------------------------|---------------------------------|------------------------------|-----------------------------------------------|----------------------|
|                                           | <5.7<br>(n=1,030)                                   | 5.7-6.4<br>(n=915)              | ≥6.5<br>(n=253)                 |                              |                                               |                      |
| Whole hippocampus,<br>HV, mm <sup>3</sup> | 5802.290<br>(5733.706-5870.874)                     | 5791.643<br>(5721.502-5861.784) | 5757.065<br>(5665.989-5848.141) | 0.491                        | -                                             | 0.539                |
| <b><i>Hippocampal subregions</i></b>      |                                                     |                                 |                                 |                              |                                               |                      |
| HATA, HV, mm <sup>3</sup>                 | 90.408<br>(88.390-92.427)                           | 90.162<br>(88.098-92.226)       | 89.222<br>(86.542-91.903)       | 0.570                        | 1.140                                         | 0.842                |
| Fimbria, HV, mm <sup>3</sup>              | 82.554<br>(78.270-86.838)                           | 80.605<br>(76.224-84.986)       | 74.327<br>(68.638-80.016)       | 0.002*                       | 0.024 <sup>†</sup>                            | 0.658                |
| Hippocampal fissure, HV, mm <sup>3</sup>  | 347.047<br>(340.472-353.621)                        | 347.849<br>(341.125-354.573)    | 351.745<br>(343.014-360.476)    | 0.433                        | 1.299                                         | 0.569                |
| Molecular_layer, HV, mm <sup>3</sup>      | 748.092<br>(737.520-758.665)                        | 750.079<br>(739.266-760.891)    | 747.125<br>(733.086-761.165)    | 0.819                        | 0.982                                         | 0.500                |
| GC ML DG, HV, mm <sup>3</sup>             | 504.765<br>(497.487-512.042)                        | 502.638<br>(495.195-510.080)    | 498.017<br>(488.353-507.681)    | 0.236                        | 0.944                                         | 0.829                |
| CA1, HV, mm <sup>3</sup>                  | 1141.216<br>(1125.193-1157.239)                     | 1136.782<br>(1120.395-1153.168) | 1135.077<br>(1113.800-1156.354) | 0.667                        | 1.000                                         | 0.642                |
| CA3, HV, mm <sup>3</sup>                  | 379.218<br>(372.477-385.959)                        | 379.487<br>(372.592-386.381)    | 371.718<br>(362.766-380.670)    | 0.096                        | 0.576                                         | 0.400                |
| CA4, HV, mm <sup>3</sup>                  | 451.326<br>(444.900-457.751)                        | 450.092<br>(443.521-456.663)    | 446.939<br>(438.407-455.472)    | 0.463                        | 1.111                                         | 0.976                |
| Subiculum, HV, mm <sup>3</sup>            | 782.103<br>(770.648-793.559)                        | 779.127<br>(767.412-790.842)    | 777.171<br>(761.959-792.383)    | 0.653                        | 1.119                                         | 0.333                |
| Presubiculum, HV, mm <sup>3</sup>         | 528.317<br>(519.067-537.566)                        | 527.970<br>(518.511-537.430)    | 524.630<br>(512.346-526.913)    | 0.764                        | 1.018                                         | 0.670                |
| Parasubiculum, HV, mm <sup>3</sup>        | 108.513<br>(104.860-112.166)                        | 108.534<br>(104.799-112.270)    | 109.586<br>(104.736-114.437)    | 0.857                        | 0.934                                         | 0.805                |
| Hippocampal tail, HV, mm <sup>3</sup>     | 985.778<br>(969.778-1001.778)                       | 986.168<br>(969.804-1002.531)   | 983.252<br>(962.004-1004.499)   | 0.946                        | 0.946                                         | 0.061                |

Abbreviations: CA, Cornu Ammonis; eTIV, estimated intracranial volume; FDR, false discovery rate; GC ML DG, granule cell and molecular cell layer of the dentate gyrus; HATA, hippocampus amygdala transition area; HV, hippocampal volume.

Values are shown as multivariable-adjusted mean values (95% confidence intervals), where values are calculated as follows: (left + right) volumes of hippocampus or

---

hippocampal subregions.

Adjusted for age, sex, educational level, research site, apolipoprotein E  $\epsilon 4$ , body mass index, hypertension, serum low-density lipoprotein cholesterol, serum high-density lipoprotein cholesterol, current smoking habits, current alcohol intakes, regular exercise, eTIV. \* p for trend < 0.05. † q-value of FDR correction < 0.05.

**Supplementary Table 13. Multivariable-adjusted mean values of the volumes of the hippocampus and hippocampal subfields by age according to glycated albumin levels**

|                                           | <75 years old, glycated albumin levels |                                 |                                 |                                 | <75 years old<br>p for trend | <75 years old<br>q-value of FDR<br>correction |
|-------------------------------------------|----------------------------------------|---------------------------------|---------------------------------|---------------------------------|------------------------------|-----------------------------------------------|
|                                           | <13.9<br>(n=1,377)                     | 13.9-14.8<br>(n=1,341)          | 14.9-16.0<br>(n=1,207)          | ≥16.1<br>(n=1,024)              |                              |                                               |
| Whole hippocampus,<br>HV, mm <sup>3</sup> | 6243.645<br>(6146.370-6340.920)        | 62573942<br>(6460.939-6354.946) | 6266.331<br>(6168.183-6364.480) | 6193.739<br>(6096.646-6290.833) | 0.008*                       | -                                             |
| <b><i>Hippocampal subregions</i></b>      |                                        |                                 |                                 |                                 |                              |                                               |
| HATA, HV, mm <sup>3</sup>                 | 98.387<br>(95.562-101.212)             | 98.688<br>(95.871-101.505)      | 98.557<br>(95.707-101.408)      | 96.827<br>(94.007-99.646)       | 0.018*                       | 0.043 <sup>†</sup>                            |
| Fimbria, HV, mm <sup>3</sup>              | 108.473<br>(102.378-114.569)           | 108.054<br>(101.976-114.133)    | 106.916<br>(100.766-113.067)    | 98.264<br>(92.180-104.348)      | <0.001*                      | <0.001 <sup>†</sup>                           |
| Hippocampal fissure, HV, mm <sup>3</sup>  | 348.474<br>(339.477-357.470)           | 348.100<br>(339.128-357.071)    | 351.504<br>(342.426-360.581)    | 353.949<br>(344.969-362.929)    | 0.015*                       | 0.045 <sup>†</sup>                            |
| Molecular_layer, HV, mm <sup>3</sup>      | 815.967<br>(800.596-831.338)           | 817.577<br>(802.249-832.905)    | 813.297<br>(797.788-828.806)    | 807.904<br>(792.562-823.247)    | 0.039*                       | 0.066                                         |
| GC ML DG, HV, mm <sup>3</sup>             | 545.385<br>(535.496-555.273)           | 546.148<br>(536.287-556.009)    | 547.850<br>(537.873-557.827)    | 539.606<br>(529.736-549.477)    | 0.003*                       | 0.018 <sup>†</sup>                            |
| CA1, HV, mm <sup>3</sup>                  | 1225.049<br>(1201.809-1248.289)        | 1225.122<br>(1201.947-1248.297) | 1230.369<br>(1206.921-1253.818) | 1216.466<br>(1193.270-1239.663) | 0.084                        | 0.112                                         |
| CA3, HV, mm <sup>3</sup>                  | 339.229<br>(389.804-408.654)           | 401.187<br>(391.788-410.586)    | 403.403<br>(393.893-412.912)    | 400.771<br>(391.363-410.178)    | 0.254                        | 0.277                                         |
| CA4, HV, mm <sup>3</sup>                  | 481.302<br>(472.709-489.895)           | 482.449<br>(473.880-491.019)    | 484.611<br>(475.940-493.281)    | 479.327<br>(470.750-487.904)    | 0.062                        | 0.093                                         |
| Subiculum, HV, mm <sup>3</sup>            | 846.736<br>(830.857-862.616)           | 847.276<br>(831.440-863.111)    | 847.246<br>(831.224-863.268)    | 836.095<br>(820.245-851.945)    | 0.005*                       | 0.020 <sup>†</sup>                            |
| Presubiculum, HV, mm <sup>3</sup>         | 563.676<br>(551.111-576.241)           | 562.282<br>(549.752-574.812)    | 561.87<br>(549.209-574.565)     | 555.067<br>(542.525-567.608)    | 0.018*                       | 0.043 <sup>†</sup>                            |
| Parasubiculum, HV, mm <sup>3</sup>        | 108.255<br>(103.842-112.669)           | 108.750<br>(104.349-113.151)    | 108.248<br>(103.795-112.701)    | 107.378<br>(102.973-111.783)    | 0.602                        | 0.602                                         |
| Hippocampal tail, HV, mm <sup>3</sup>     | 1051.187<br>(1026.137-1076.236)        | 1060.408<br>(1035.428-1085.388) | 1063.946<br>(1038.671-1089.221) | 1056.035<br>(1031.031-1081.038) | 0.112                        | 0.134                                         |

**(Continued) Supplementary Table 13. Multivariable-adjusted mean values of the volumes of the hippocampus and hippocampal subfields by age according to glycated albumin levels**

|                                           | ≥75 years old, glycated albumin levels |                                 |                                 |                                 | ≥75 years old<br>p for trend | ≥75 years old<br>q-value of FDR<br>correction | p for<br>interaction |
|-------------------------------------------|----------------------------------------|---------------------------------|---------------------------------|---------------------------------|------------------------------|-----------------------------------------------|----------------------|
|                                           | <13.9<br>(n=359)                       | 13.9-14.8<br>(n=513)            | 14.9-16.0<br>(n=608)            | ≥16.1<br>(n=682)                |                              |                                               |                      |
| Whole hippocampus,<br>HV, mm <sup>3</sup> | 5813.822<br>(5733.609-5894.035)        | 5781.341<br>(5704.625-5858.056) | 5818.887<br>(5744.858-5892.916) | 5764.871<br>(5691.341-5838.402) | 0.249                        |                                               | 0.184                |
| <b><i>Hippocampal subregions</i></b>      |                                        |                                 |                                 |                                 |                              |                                               |                      |
| HATA, HV, mm <sup>3</sup>                 | 90.858<br>(88.496-93.219)              | 89.866<br>(87.608-92.124)       | 90.709<br>(88.530-92.888)       | 89.483<br>(87.319-91.647)       | 0.410                        | 0.615                                         | 0.322                |
| Fimbria, HV, mm <sup>3</sup>              | 82.733<br>(77.713-87.754)              | 81.643<br>(76.842-86.445)       | 82.199<br>(77.565-86.832)       | 78.165<br>(73.563-82.768)       | 0.086                        | 1.032                                         | 0.041 <sup>z</sup>   |
| Hippocampal fissure, HV, mm <sup>3</sup>  | 347.607<br>(339.914-355.300)           | 345.270<br>(337.912-352.627)    | 347.501<br>(340.401-354.600)    | 350.095<br>(343.043-357.148)    | 0.460                        | 0.552                                         | 0.045 <sup>z</sup>   |
| Molecular_layer, HV, mm <sup>3</sup>      | 749.918<br>(737.546-762.290)           | 747.980<br>(736.147-759.812)    | 750.657<br>(739.239-762.075)    | 746.897<br>(735.555-758.238)    | 0.851                        | 0.851                                         | 0.085                |
| GC ML DG, HV, mm <sup>3</sup>             | 506.791<br>(498.280-515.301)           | 503.127<br>(494.988-511.267)    | 505.211<br>(497.356-513.066)    | 498.989<br>(491.187-506.790)    | 0.122                        | 0.732                                         | 0.214                |
| CA1, HV, mm <sup>3</sup>                  | 1146.091<br>(1127.346-1164.836)        | 1135.210<br>(1117.282-1153.137) | 1140.112<br>(1122.812-1157.412) | 1134.958<br>(1117.775-1152.141) | 0.509                        | 0.555                                         | 0.050                |
| CA3, HV, mm <sup>3</sup>                  | 381.428<br>(373.541-389.315)           | 379.260<br>(371.716-387.661)    | 380.381<br>(373.102-387.661)    | 374.511<br>(367.280-381.741)    | 0.124                        | 0.496                                         | 0.058                |
| CA4, HV, mm <sup>3</sup>                  | 452.906<br>(445.390-460.422)           | 449.776<br>(442.587-456.964)    | 451.598<br>(445.049-458.922)    | 447.598<br>(440.709-454.488)    | 0.302                        | 0.517                                         | 0.183                |
| Subiculum, HV, mm <sup>3</sup>            | 786.071<br>(772.678-799.464)           | 777.535<br>(767.727-790.344)    | 783.737<br>(771.377-796.098)    | 775.310<br>(763.033-787.587)    | 0.173                        | 0.519                                         | 0.177                |
| Presubiculum, HV, mm <sup>3</sup>         | 528.528<br>(517.768-539.395)           | 524.956<br>(514.614-535.298)    | 532.711<br>(522.731-542.690)    | 524.890<br>(514.977-534.803)    | 0.179                        | 0.429                                         | 0.425                |
| Parasubiculum, HV, mm <sup>3</sup>        | 110.275<br>(106.004-114.546)           | 106.704<br>(102.619-110.788)    | 109.457<br>(105.516-113.399)    | 108.016<br>(104.101-111.931)    | 0.219                        | 0.438                                         | 0.195                |
| Hippocampal tail, HV, mm <sup>3</sup>     | 978.170<br>(959.457-996.884)           | 985.284<br>(967.386-1003.182)   | 991.727<br>(974.456-1008.998)   | 986.054<br>(968.900-1003.209)   | 0.434                        | 0.578                                         | 0.214                |

Abbreviations: CA, Cornu Ammonis; eTIV, estimated intracranial volume; FDR, false discovery rate; GC ML DG, granule cell and molecular cell layer of the dentate gyrus; HATA, hippocampus amygdala transition area; HV, hippocampal volume.

Values are shown as multivariable-adjusted mean values (95% confidence intervals), where values are calculated as follows: (left + right) volumes of hippocampus or hippocampal subregions.

Adjusted for age, sex, educational level, research site, apolipoprotein E  $\epsilon 4$ , body mass index, hypertension, serum low-density lipoprotein cholesterol, serum high-density lipoprotein

---

cholesterol, current smoking habits, current alcohol intakes, regular exercise, eTIV. \* p for trend < 0.05. † q-value of FDR correction < 0.05.  $\chi$  p for interaction < 0.05.

**Supplementary Table 14. Multivariable-adjusted mean values of the volumes of the hippocampus and hippocampal subfields by age according to homeostasis model assessment of  $\beta$  cell function (HOMA- $\beta$ ) levels**

|                                           | <75 years old, HOMA- $\beta$ levels |                                 | <75 years old<br>p for trend | <75 years old<br>q-value of FDR<br>correction |
|-------------------------------------------|-------------------------------------|---------------------------------|------------------------------|-----------------------------------------------|
|                                           | $\leq 30$<br>(n=195)                | $> 30$<br>(n=2,161)             |                              |                                               |
| Whole hippocampus,<br>HV, mm <sup>3</sup> | 6130.823<br>(5935.229-6326.427)     | 6230.690<br>(6047.986-6413.396) | 0.013*                       |                                               |
| <b><i>Hippocampal subregions</i></b>      |                                     |                                 |                              |                                               |
| HATA, HV, mm <sup>3</sup>                 | 96.153<br>(90.546-101.760)          | 98.179<br>(92.942-103.416)      | 0.079                        | 0.118                                         |
| Fimbria, HV, mm <sup>3</sup>              | 112.490<br>(99.865-125.116)         | 120.054<br>(108.260-131.848)    | 0.004*                       | 0.048 <sup>†</sup>                            |
| Hippocampal fissure, HV, mm <sup>3</sup>  | 339.352<br>(321.037-357.666)        | 337.039<br>(319.931-354.146)    | 0.539                        | 0.588                                         |
| Molecular_layer, HV, mm <sup>3</sup>      | 877.844<br>(845.999-909.688)        | 0890.006<br>(860.260-919.751)   | 0.063                        | 0.126                                         |
| GC ML DG, HV, mm <sup>3</sup>             | 527.744<br>(508.453-547.035)        | 536.790<br>(518.771-554.809)    | 0.023*                       | 0.138                                         |
| CA1, HV, mm <sup>3</sup>                  | 1182.261<br>(1135.867-1228.654)     | 1200.850<br>(1157.514-1244.185) | 0.051                        | 0.153                                         |
| CA3, HV, mm <sup>3</sup>                  | 395.494<br>(376.665-414.324)        | 400.458<br>(382.870-418.047)    | 0.119                        | 0.158                                         |
| CA4, HV, mm <sup>3</sup>                  | 465.237<br>(448.511-481.963)        | 471.900<br>(456.276-487.523)    | 0.053                        | 0.127                                         |
| Subiculum, HV, mm <sup>3</sup>            | 806.631<br>(775.366-837.897)        | 818.418<br>(789.213-847.622)    | 0.067                        | 0.114                                         |
| Presubiculum, HV, mm <sup>3</sup>         | 541.727<br>(517.334-566.120)        | 548.005<br>(525.220-570.790)    | 0.210                        | 0.252                                         |
| Parasubiculum, HV, mm <sup>3</sup>        | 117.645<br>(108.859-126.431)        | 117.165<br>(108.958-125.372)    | 0.790                        | 0.790                                         |
| Hippocampal tail, HV, mm <sup>3</sup>     | 1007.601<br>(956.356-1058.846)      | 1028.865<br>(980.998-1076.732)  | 0.044*                       | 0.176                                         |



**(Continued) Supplementary Table 14. Multivariable-adjusted mean values of the volumes of the hippocampus and hippocampal subfields by age according to homeostasis model assessment of  $\beta$  cell function (HOMA- $\beta$ ) levels**

|                                           | $\geq 75$ years old, HOMA- $\beta$ levels |                                 | $\geq 75$ years old<br>p for trend | $\geq 75$ years old<br>q-value of FDR<br>correction | p for interaction |
|-------------------------------------------|-------------------------------------------|---------------------------------|------------------------------------|-----------------------------------------------------|-------------------|
|                                           | $\leq 30$<br>(n=62)                       | $> 30$<br>(n=679)               |                                    |                                                     |                   |
| Whole hippocampus,<br>HV, mm <sup>3</sup> | 5716.771<br>(5548.371-5885.171)           | 5774.374<br>(5658.364-5890.384) | 0.427                              | -                                                   | 0.593             |
| <b><i>Hippocampal subregions</i></b>      |                                           |                                 |                                    |                                                     |                   |
| HATA, HV, mm <sup>3</sup>                 | 85.416<br>(80.679-90.153)                 | 86.386<br>(83.123-89.649)       | 0.634                              | 0.951                                               | 0.726             |
| Fimbria, HV, mm <sup>3</sup>              | 79.642<br>(68.973-90.312)                 | 85.146<br>(77.795-92.496)       | 0.231                              | 2.772                                               | 0.716             |
| Hippocampal fissure, HV, mm <sup>3</sup>  | 350.778<br>(335.493-366.063)              | 343.256<br>(332.726-353.785)    | 0.253                              | 1.012                                               | 0.152             |
| Molecular_layer, HV, mm <sup>3</sup>      | 807.348<br>(782.644-832.910)              | 811.348<br>(794.034-828.662)    | 0.742                              | 0.890                                               | 0.502             |
| GC ML DG, HV, mm <sup>3</sup>             | 486.938<br>(469.617-504.258)              | 494.443<br>(482.511-506.375)    | 0.315                              | 0.945                                               | 0.264             |
| CA1, HV, mm <sup>3</sup>                  | 1125.731<br>(1085.930-1165.532)           | 1128.746<br>(1101.328-1156.165) | 0.860                              | 0.860                                               | 0.161             |
| CA3, HV, mm <sup>3</sup>                  | 366.431<br>(350.468-382.393)              | 370.711<br>(359.715-381.708)    | 0.534                              | 1.068                                               | 0.647             |
| CA4, HV, mm <sup>3</sup>                  | 435.432<br>(420.265-450.598)              | 440.508<br>(430.060-450.956)    | 0.437                              | 1.048                                               | 0.917             |
| Subiculum, HV, mm <sup>3</sup>            | 758.385<br>(730.929-785.842)              | 772.316<br>(753.401-791.231)    | 0.239                              | 1.434                                               | 0.924             |
| Presubiculum, HV, mm <sup>3</sup>         | 506.002<br>(484.318-527.685)              | 511.025<br>(496.088-525.963)    | 0.591                              | 1.013                                               | 0.876             |
| Parasubiculum, HV, mm <sup>3</sup>        | 102.367<br>(93.653-111.081)               | 103.199<br>(97.197-109.202)     | 0.824                              | 0.898                                               | 0.872             |
| Hippocampal tail, HV, mm <sup>3</sup>     | 962.651<br>(923.014-1002.288)             | 970.546<br>(943.240-997.852)    | 0.644                              | 0.858                                               | 0.715             |

Abbreviations: CA, Cornu Ammonis; eTIV, estimated intracranial volume; FDR, false discovery rate; GC ML DG, granule cell and molecular cell layer of the dentate gyrus; HATA, hippocampus amygdala transition area; HOMA- $\beta$ , homeostasis model assessment of percent beta cell function; HV, hippocampal volume.

Values are shown as multivariable-adjusted mean values (95% confidence intervals), where values are calculated as follows: (left + right) volumes of hippocampus or

---

hippocampal subregions.

Adjusted for age, sex, educational level, research site, apolipoprotein E  $\epsilon 4$ , body mass index, hypertension, serum low-density lipoprotein cholesterol, serum high-density lipoprotein cholesterol, current smoking habits, current alcohol intakes, regular exercise, eTIV. \* p for trend < 0.05. † q-value of FDR correction < 0.05.  $\chi$  p for interaction < 0.05.

**Supplementary Table 15. Multivariable-adjusted mean values of the volumes of the hippocampus and hippocampal subfields by age according to homeostasis model assessment of insulin resistance (HOMA-IR) levels**

|                                           | <75 years old, HOMA-IR levels, % |                                 |                                 | <75 years old<br>p for trend | <75 years old<br>q-value of FDR<br>correction |
|-------------------------------------------|----------------------------------|---------------------------------|---------------------------------|------------------------------|-----------------------------------------------|
|                                           | <1.6<br>(n=1,790)                | 1.6-2.4<br>(n=422)              | ≥2.5<br>(n=144)                 |                              |                                               |
| Whole hippocampus,<br>HV, mm <sup>3</sup> | 6223.522<br>(6040.517-6406.526)  | 6204.943<br>(6015.162-6394.725) | 6192.928<br>(5988.506-6397.350) | 0.735                        | -                                             |
| <b><i>Hippocampal subregions</i></b>      |                                  |                                 |                                 |                              |                                               |
| HATA, HV, mm <sup>3</sup>                 | 98.025<br>(92.782-103.267)       | 97.489<br>(92.052-102.926)      | 98.137<br>(92.281-103.993)      | 0.804                        | 1.378                                         |
| Fimbria, HV, mm <sup>3</sup>              | 119.311<br>(107.492-131.130)     | 119.450<br>(107.193-131.707)    | 117.131<br>(1003.929-130.333)   | 0.769                        | 2.307                                         |
| Hippocampal fissure, HV, mm <sup>3</sup>  | 337.837<br>(320.729-354.946)     | 335.235<br>(317.493-352.977)    | 332.140<br>(313.029-351.251)    | 0.379                        | 2.274                                         |
| Molecular_layer, HV, mm <sup>3</sup>      | 889.088<br>(859.310-918.866)     | 887.240<br>(856.359-918.121)    | 885.171<br>(851.907-918.434)    | 0.857                        | 1.285                                         |
| GC ML DG, HV, mm <sup>3</sup>             | 535.901<br>(517.854-553.948)     | 535.603<br>(516.888-554.319)    | 534.797<br>(514.638-554.956)    | 0.973                        | 0.973                                         |
| CA1, HV, mm <sup>3</sup>                  | 1199.594<br>(1156.209-1242.980)  | 1195.520<br>(1150.528-1240.512) | 1193.862<br>(1145.325-1242.325) | 0.796                        | 1.592                                         |
| CA3, HV, mm <sup>3</sup>                  | 400.022<br>(382.421-417.624)     | 399.328<br>(381.075-417.582)    | 399.801<br>(380.139-419.462)    | 0.972                        | 1.060                                         |
| CA4, HV, mm <sup>3</sup>                  | 471.388<br>(455.746-487.030)     | 470.288<br>(454.067-486.509)    | 469.752<br>(452.280-487.225)    | 0.875                        | 1.166                                         |
| Subiculum, HV, mm <sup>3</sup>            | 818.571<br>(789.362-847.781)     | 811.883<br>(781.592-842.174)    | 803.881<br>(771.253-836.509)    | 0.110                        | 1.320                                         |
| Presubiculum, HV, mm <sup>3</sup>         | 547.676<br>(524.876-570.475)     | 546.158<br>(522.514-569.802)    | 543.780<br>(518.312-569.248)    | 0.791                        | 1.898                                         |
| Parasubiculum, HV, mm <sup>3</sup>        | 117.168<br>(108.959-125.377)     | 116.970<br>(108.457-125.483)    | 119.054<br>(109.885-128.224)    | 0.653                        | 2.612                                         |
| Hippocampal tail, HV, mm <sup>3</sup>     | 1026.776<br>(978.847-1074.706)   | 1025.014<br>(975.310-1074.718)  | 1027.562<br>(974.023-1081.100)  | 0.969                        | 1.162                                         |

**(Continued) Supplementary Table 15. Multivariable-adjusted mean values of the volumes of the hippocampus and hippocampal subfields by age according to homeostasis model assessment of insulin resistance (HOMA-IR) levels**

|                                           | ≥75 years old, HOMA-IR levels, % |                                 |                                 | ≥75 years old<br>p for trend | ≥75 years old<br>q-value of FDR<br>correction | p for<br>interaction |
|-------------------------------------------|----------------------------------|---------------------------------|---------------------------------|------------------------------|-----------------------------------------------|----------------------|
|                                           | <1.6<br>(n=554)                  | 1.6-2.4<br>(n=134)              | ≥2.5<br>(n=53)                  |                              |                                               |                      |
| Whole hippocampus,<br>HV, mm <sup>3</sup> | 5784.288<br>(5667.280-5901.295)  | 5716.705<br>(5571.435-5861.976) | 5704.414<br>(5522.320-5886.508) | 0.359                        | -                                             | 0.829                |
| <b><i>Hippocampal subregions</i></b>      |                                  |                                 |                                 |                              |                                               |                      |
| HATA, HV, mm <sup>3</sup>                 | 86.535<br>(83.242-89.828)        | 85.451<br>(81.362-89.539)       | 85.294<br>(80.168-90.419)       | 0.772                        | 0.926                                         | 0.771                |
| Fimbria, HV, mm <sup>3</sup>              | 84.589<br>(77.161-92.018)        | 83.585<br>(74.363-92.808)       | 84.277<br>(72.717-95.837)       | 0.959                        | 1.046                                         | 0.999                |
| Hippocampal fissure, HV, mm <sup>3</sup>  | 344.215<br>(333.575-354.856)     | 345.135<br>(331.924-358.345)    | 343.291<br>(326.732-359.851)    | 0.969                        | 0.969                                         | 0.488                |
| Molecular_layer, HV, mm <sup>3</sup>      | 814.121<br>(796.691-831.552)     | 797.959<br>(776.318-819.600)    | 804.473<br>(777.347-831.600)    | 0.130                        | 1.560                                         | 0.786                |
| GC ML DG, HV, mm <sup>3</sup>             | 495.387<br>(483.351-507.423)     | 489.225<br>(474.282-504.168)    | 484.732<br>(466.001-503.462)    | 0.316                        | 0.948                                         | 0.510                |
| CA1, HV, mm <sup>3</sup>                  | 1129.848<br>(1102.207-1157.488)  | 1113.451<br>(1079.134-1147.768) | 1137.910<br>(1094.894-1180.925) | 0.341                        | 0.682                                         | 0.843                |
| CA3, HV, mm <sup>3</sup>                  | 371.274<br>(360.182-382.365)     | 370.515<br>(356.744-384.286)    | 361.090<br>(343.828-378.351)    | 0.417                        | 0.714                                         | 0.248                |
| CA4, HV, mm <sup>3</sup>                  | 441.470<br>(430.934-452.006)     | 437.152<br>(424.071-450.233)    | 431.249<br>(414.852-447.645)    | 0.322                        | 0.772                                         | 0.370                |
| Subiculum, HV, mm <sup>3</sup>            | 773.393<br>(754.309-792.477)     | 766.572<br>(742.878-790.265)    | 753.859<br>(724.160-783.559)    | 0.310                        | 1.240                                         | 0.649                |
| Presubiculum, HV, mm <sup>3</sup>         | 512.150<br>(497.083-527.217)     | 508.883<br>(490.177-527.590)    | 498.907<br>(475.459-522.355)    | 0.446                        | 0.669                                         | 0.641                |
| Parasubiculum, HV, mm <sup>3</sup>        | 104.056<br>(98.008-110.104)      | 102.296<br>(94.788-109.307)     | 96.895<br>(87.482-106.307)      | 0.231                        | 1.386                                         | 0.368                |
| Hippocampal tail, HV, mm <sup>3</sup>     | 971.463<br>(943.902-999.025)     | 961.617<br>(927.398-995.835)    | 965.730<br>(922.838-1008.623)   | 0.739                        | 0.985                                         | 0.997                |

Abbreviations: CA, Cornu Ammonis; eTIV, estimated intracranial volume; FDR, false discovery rate; GC ML DG, granule cell and molecular cell layer of the dentate gyrus; HATA, hippocampus amygdala transition area; HOMA-IR, homeostasis model assessment of insulin resistance; HV, hippocampal volume.

Values are shown as multivariable-adjusted mean values (95% confidence intervals), where values are calculated as follows: (left + right) volumes of hippocampus or hippocampal subregions.

---

Adjusted for age, sex, educational level, research site, apolipoprotein E  $\epsilon 4$ , body mass index, hypertension, serum low-density lipoprotein cholesterol, serum high-density lipoprotein cholesterol, current smoking habits, current alcohol intakes, regular exercise, eTIV. \* p for trend < 0.05. † q-value of FDR correction < 0.05.  $\chi$  p for interaction < 0.05.

**Supplementary Table 16. Multivariable-adjusted mean values of the volumes of the hippocampus and hippocampal subfields with or without *ApoE*  $\epsilon 4$  according to hemoglobinA<sub>1c</sub> levels**

|                                           | <i>ApoE</i> $\epsilon 4$ +, hemoglobin A <sub>1c</sub> levels, % |                                 |                                 | <i>ApoE</i> $\epsilon 4$ +<br>p for trend | <i>ApoE</i> $\epsilon 4$ +<br>q-value of FDR<br>correction |
|-------------------------------------------|------------------------------------------------------------------|---------------------------------|---------------------------------|-------------------------------------------|------------------------------------------------------------|
|                                           | <5.7<br>(n=609)                                                  | 5.7-6.4<br>(n=487)              | ≥6.5<br>(n=117)                 |                                           |                                                            |
| Whole hippocampus,<br>HV, mm <sup>3</sup> | 6180.011<br>(6062.438-6297.584)                                  | 6156.560<br>(6035.441-6277.680) | 6083.188<br>(5934.651-6231.726) | 0.190                                     | -                                                          |
| <b><i>Hippocampal subregions</i></b>      |                                                                  |                                 |                                 |                                           |                                                            |
| HATA, HV, mm <sup>3</sup>                 | 96.454<br>(93.029-99.879)                                        | 94.192<br>(90.664-97.720)       | 94.216<br>(89.889-98.543)       | 0.040*                                    | 0.160                                                      |
| Fimbria, HV, mm <sup>3</sup>              | 104.964<br>(97.601-112.328)                                      | 97.559<br>(89.972-105.145)      | 91.537<br>(82.234-100.840)      | <0.001*                                   | <0.001 <sup>†</sup>                                        |
| Hippocampal fissure, HV, mm <sup>3</sup>  | 351.315<br>(340.150-362.479)                                     | 352.467<br>(340.966-363.968)    | 356.194<br>(342.089-370.299)    | 0.626                                     | 0.834                                                      |
| Molecular_layer, HV, mm <sup>3</sup>      | 807.906<br>(788.719-827.093)                                     | 802.932<br>(783.167-822.698)    | 799.004<br>(774.764-823.245)    | 0.470                                     | 0.928                                                      |
| GC ML DG, HV, mm <sup>3</sup>             | 539.723<br>(527.506-551.940)                                     | 539.427<br>(526.842-552.013)    | 535.801<br>(520.367-551.236)    | 0.774                                     | 0.974                                                      |
| CA1, HV, mm <sup>3</sup>                  | 1207.625<br>(1180.152-1235.098)                                  | 1203.784<br>(1175.483-1232.086) | 1195.421<br>(1160.712-1230.129) | 0.602                                     | 0.9433                                                     |
| CA3, HV, mm <sup>3</sup>                  | 397.188<br>(385.820-408.557)                                     | 397.633<br>(385.922-409.345)    | 395.125<br>(380.789-409.514)    | 0.893                                     | 0.974                                                      |
| CA4, HV, mm <sup>3</sup>                  | 478.154<br>(467.589-488.719)                                     | 478.865<br>(467.981-489.748)    | 477.400<br>(464.053-490.747)    | 0.943                                     | 0.943                                                      |
| Subiculum, HV, mm <sup>3</sup>            | 843.728<br>(824.751-862.705)                                     | 838.138<br>(818.589-857.688)    | 824.125<br>(800.151-848.100)    | 0.069                                     | .0.207                                                     |
| Presubiculum, HV, mm <sup>3</sup>         | 561.069<br>(545.740-576.398)                                     | 555.767<br>(539.975-571.559)    | 547.306<br>(527.939-566.672)    | 0.109                                     | 0.261                                                      |
| Parasubiculum, HV, mm <sup>3</sup>        | 106.442<br>(100.969-111.915)                                     | 102.556<br>(96.918-108.915)     | 104.006<br>(97.092-110.920)     | 0.034*                                    | 0.204                                                      |
| Hippocampal tail, HV, mm <sup>3</sup>     | 1036.758<br>(1006.003-1067.512)                                  | 1045.706<br>(1014.024-1077.388) | 1019.220<br>(980.366-1058.074)  | 0.152                                     | 0.304                                                      |

**(Continued) Supplementary Table 16. Multivariable-adjusted mean values of the volumes of the hippocampus and hippocampal subfields with or without *ApoE*  $\epsilon 4$  according to hemoglobinA<sub>1c</sub> levels**

|                                           | <i>ApoE</i> $\epsilon 4$ -, hemoglobin A <sub>1c</sub> levels, % |                                 |                                 | <i>ApoE</i> $\epsilon 4$ –<br>p for trend | <i>ApoE</i> $\epsilon 4$ –<br>q-value of FDR<br>correction | p for<br>interaction |
|-------------------------------------------|------------------------------------------------------------------|---------------------------------|---------------------------------|-------------------------------------------|------------------------------------------------------------|----------------------|
|                                           | <5.7<br>(n=2,748)                                                | 5.7-6.4<br>(n=2,456)            | ≥6.5<br>(n=667)                 |                                           |                                                            |                      |
| Whole hippocampus,<br>HV, mm <sup>3</sup> | 6193.611<br>(6148.240-6238.982)                                  | 6205.362<br>(6159.166-6251.557) | 6134.264<br>(6076.682-6191.846) | 0.009*                                    | -                                                          | 0.678                |
| <b><i>Hippocampal subregions</i></b>      |                                                                  |                                 |                                 |                                           |                                                            |                      |
| HATA, HV, mm <sup>3</sup>                 | 97.249<br>(95.921-98.577)                                        | 97.359<br>(96.007-98.711)       | 95.815<br>(94.129-97.500)       | 0.068                                     | 0.090                                                      | 0.096                |
| Fimbria, HV, mm <sup>3</sup>              | 102.074<br>(99.229-104.919)                                      | 100.284<br>(97.387-103.181)     | 94.273<br>(0.0064-0.0070)       | <0.001*                                   | <0.001 <sup>†</sup>                                        | 0.035%               |
| Hippocampal fissure, HV, mm <sup>3</sup>  | 344.543<br>(340.262-348.824)                                     | 347.487<br>(343.128-351.846)    | 349.247<br>(343.813-354.680)    | 0.036*                                    | 0.061                                                      | 0.846                |
| Molecular_layer, HV, mm <sup>3</sup>      | 802.846<br>(795.628-810.064)                                     | 805.800<br>(798.451-813.149)    | 796.612<br>(787.452-805.773)    | 0.040*                                    | 0.060                                                      | 0.467                |
| GC ML DG, HV, mm <sup>3</sup>             | 514.246<br>(536.579-545.912)                                     | 514.353<br>(536.602-546.104)    | 535.337<br>(529.415-541.259)    | 0.032*                                    | 0.064                                                      | 0.927                |
| CA1, HV, mm <sup>3</sup>                  | 1213.519<br>(1202.746-1224.293)                                  | 1216.626<br>(1205.657-1227.596) | 1206.674<br>(1193.001-1220.347) | 0.186                                     | 0.202                                                      | 0.853                |
| CA3, HV, mm <sup>3</sup>                  | 397.188<br>(392.757-401.619)                                     | 400.067<br>(395.556-404.579)    | 394.918<br>(389.295-400.542)    | 0.031*                                    | 0.074                                                      | 0.785                |
| CA4, HV, mm <sup>3</sup>                  | 478.559<br>(474.473-482.644)                                     | 479.519<br>(475.359-483.679)    | 475.668<br>(470.483-480.853)    | 0.182                                     | 0.218                                                      | 0.912                |
| Subiculum, HV, mm <sup>3</sup>            | 838.814<br>(831.343-846.286)                                     | 837.372<br>(829.765-844.980)    | 826.479<br>(816.996-835.961)    | 0.005*                                    | 0.030 <sup>†</sup>                                         | 0.762                |
| Presubiculum, HV, mm <sup>3</sup>         | 560.447<br>(554.512-566.382)                                     | 557.626<br>(551.583-563.669)    | 551.294<br>(543.761-558.827)    | 0.011*                                    | 0.044 <sup>†</sup>                                         | 0.732                |
| Parasubiculum, HV, mm <sup>3</sup>        | 109.973<br>(107.610-111.976)                                     | 109.195<br>(106.973-111.418)    | 109.449<br>(106.678-112.220)    | 0.707                                     | 0.707                                                      | 0.087                |
| Hippocampal tail, HV, mm <sup>3</sup>     | 1051.875<br>(1040.601-1063.149)                                  | 1060.160<br>(1048.681-1071.639) | 1047.744<br>(1033.436-1062.052) | 0.025*                                    | 0.075                                                      | 0.675                |

Abbreviations: *ApoE*  $\epsilon 4$ , apolipoprotein E  $\epsilon 4$ ; CA, Cornu Ammonis; eTIV, estimated intracranial volume; FDR, false discovery rate; GC ML DG, granule cell and molecular cell layer of the dentate gyrus; HATA, hippocampus amygdala transition area; HV, hippocampal volume.

Values are shown as multivariable-adjusted mean values (95% confidence intervals), where values are calculated as follows: (left + right) volumes of hippocampus or

---

hippocampal subregions.

Adjusted for age, sex, educational level, research site, apolipoprotein E  $\epsilon 4$ , body mass index, hypertension, serum low-density lipoprotein cholesterol, serum high-density lipoprotein cholesterol, current smoking habits, current alcohol intakes, regular exercise, eTIV. \* p for trend < 0.05. † q-value of FDR correction < 0.05.  $\chi$  p for interaction < 0.05.



**Supplementary Table 17. Multivariable-adjusted mean values of the volumes of the hippocampus and hippocampal subfields with or without *ApoE*  $\epsilon 4$  according to glycated albumin levels**

|                                           | <i>ApoE</i> $\epsilon 4$ +, glycated albumin levels |                                 |                                 |                                 | <i>ApoE</i> $\epsilon 4$ +<br>p for trend | <i>ApoE</i> $\epsilon 4$ +<br>q-value of FDR<br>correction |
|-------------------------------------------|-----------------------------------------------------|---------------------------------|---------------------------------|---------------------------------|-------------------------------------------|------------------------------------------------------------|
|                                           | <13.9<br>(n=276)                                    | 13.9-14.8<br>(n=322)            | 14.9-16.0<br>(n=311)            | $\geq 16.1$<br>(n=278)          |                                           |                                                            |
| Whole hippocampus,<br>HV, mm <sup>3</sup> | 6196.034<br>(6070.276-6321.792)                     | 6163.145<br>(6037.431-6288.858) | 6218.527<br>(6092.914-6344.140) | 6074.272<br>(5946.541-6202.002) | 0.007*                                    | -                                                          |
| <b><i>Hippocampal subregions</i></b>      |                                                     |                                 |                                 |                                 |                                           |                                                            |
| HATA, HV, mm <sup>3</sup>                 | 96.483<br>(92.836-100.131)                          | 95.450<br>(91.804-99.096)       | 96.763<br>(93.120-100.406)      | 93.176<br>(89.472-96.881)       | 0.023*                                    | 0.055                                                      |
| Fimbria, HV, mm <sup>3</sup>              | 105.141<br>(97.218-113.064)                         | 103.495<br>(95.539-111.379)     | 101.811<br>(93.897-109.724)     | 94.217<br>(86.170-102.264)      | <0.001*                                   | 0.009 <sup>†</sup>                                         |
| Hippocampal fissure, HV, mm <sup>3</sup>  | 351.050<br>(339.169-362.931)                        | 353.086<br>(341.210-364.963)    | 352.079<br>(340.212-363.947)    | 353.643<br>(341.576-365.711)    | 0.933                                     | 0.933                                                      |
| Molecular_layer, HV, mm <sup>3</sup>      | 813.681<br>(793.120-834.242)                        | 804.368<br>(783.814-824.922)    | 806.093<br>(785.556-826.631)    | 795.796<br>(774.913-816.680)    | 0.126                                     | 0.168                                                      |
| GC ML DG, HV, mm <sup>3</sup>             | 541.692<br>(528.651-554.733)                        | 538.049<br>(525.013-551.085)    | 545.900<br>(532.874-558.925)    | 530.215<br>(516.969-543.460)    | 0.005*                                    | 0.030 <sup>†</sup>                                         |
| CA1, HV, mm <sup>3</sup>                  | 1214.934<br>(1185.478-1244.390)                     | 1203.516<br>(1174.070-1232.962) | 1213.289<br>(1183.866-1242.711) | 1187.598<br>(1157.680-1217.516) | 0.036*                                    | 0.072                                                      |
| CA3, HV, mm <sup>3</sup>                  | 396.978<br>(384.801-409.154)                        | 396.192<br>(384.020-408.364)    | 402.639<br>(390.477-414.801)    | 392.657<br>(380.289-405.024)    | 0.113                                     | 0.169                                                      |
| CA4, HV, mm <sup>3</sup>                  | 478.622<br>(467.321-489.922)                        | 477.187<br>(465.891-488.483)    | 484.574<br>(473.287-495.861)    | 472.218<br>(460.741-483.695)    | 0.016*                                    | 0.048 <sup>†</sup>                                         |
| Subiculum, HV, mm <sup>3</sup>            | 842.824<br>(822.489-863.158)                        | 845.877<br>(825.550-866.205)    | 846.105<br>(825.794-866.415)    | 825.521<br>(804.868-866.415)    | 0.011*                                    | 0.044 <sup>†</sup>                                         |
| Presubiculum, HV, mm <sup>3</sup>         | 559.898<br>(543.448-576.348)                        | 560.815<br>(544.372-577.259)    | 560.283<br>(543.852-576.714)    | 552.124<br>(535.416-568.832)    | 0.399                                     | 0.435                                                      |
| Parasubiculum, HV, mm <sup>3</sup>        | 106.546<br>(100.686-112.406)                        | 104.966<br>(99.108-110.824)     | 105.040<br>(99.187-110.894)     | 102.694<br>(96.742-108.646)     | 0.350                                     | 0.420                                                      |
| Hippocampal tail, HV, mm <sup>3</sup>     | 1039.236<br>(1006.262-1072.210)                     | 1033.265<br>(1000.302-1066.227) | 1056.030<br>(1023.094-1088.966) | 1028.056<br>(994.565-1061.548)  | 0.066                                     | 0.113                                                      |

**(Continued) Supplementary Table 17. Multivariable-adjusted mean values of the volumes of the hippocampus and hippocampal subfields with or without *ApoE*  $\epsilon 4$  according to glycated albumin levels**

|                                           | <i>ApoE</i> $\epsilon 4$ -, glycated albumin levels |                                 |                                 |                                 | <i>ApoE</i> $\epsilon 4$ –<br>p for trend | <i>ApoE</i> $\epsilon 4$ –<br>q-value of<br>FDR<br>correction | p for<br>interaction |
|-------------------------------------------|-----------------------------------------------------|---------------------------------|---------------------------------|---------------------------------|-------------------------------------------|---------------------------------------------------------------|----------------------|
|                                           | <13.9<br>(n=1,429)                                  | 13.9-14.8<br>(n=1,483)          | 14.9-16.0<br>(n=1,456)          | $\geq 16.1$<br>(n=1,379)        |                                           |                                                               |                      |
| Whole hippocampus,<br>HV, mm <sup>3</sup> | 6189.441<br>(6139.733-6239.149)                     | 6195.885<br>(6146.037-6245.733) | 6202.989<br>(6152.960-6253.017) | 6154.271<br>(6104.529-6204.014) | 0.073                                     |                                                               | 0.312                |
| <b><i>Hippocampal subregions</i></b>      |                                                     |                                 |                                 |                                 |                                           |                                                               |                      |
| HATA, HV, mm <sup>3</sup>                 | 97.297<br>(95.845-98.748)                           | 97.418<br>(95.962-98.873)       | 97.360<br>(95.899-98.821)       | 96.222<br>(94.770-97.657)       | 0.135                                     | 0.270                                                         | 0.399                |
| Fimbria, HV, mm <sup>3</sup>              | 103.101<br>(99.994-106.209)                         | 102.484<br>(99.367-105.600)     | 101.919<br>(98.791-105.047)     | 95.163<br>(92.053-98.273)       | <0.001*                                   | <0.001 <sup>†</sup>                                           | 0.947                |
| Hippocampal fissure, HV, mm <sup>3</sup>  | 342.730<br>(338.065-347.395)                        | 341.938<br>(337.259-346.616)    | 345.530<br>(340.835-350.225)    | 348.007<br>(343.338-352.675)    | 0.005*                                    | 0.030 <sup>†</sup>                                            | 0.795                |
| Molecular_layer, HV, mm <sup>3</sup>      | 804.395<br>(796.487-812.302)                        | 805.574<br>(797.644-813.504)    | 801.972<br>(794.014-809.931)    | 799.179<br>(791.266-807.092)    | 0.202                                     | 0.303                                                         | 0.530                |
| GC ML DG, HV, mm <sup>3</sup>             | 541.119<br>(536.010-546.228)                        | 541.614<br>(536.491-546.737)    | 542.081<br>(536.939-547.222)    | 536.055<br>(530.943-541.167)    | 0.012*                                    | 0.048 <sup>†</sup>                                            | 0.231                |
| CA1, HV, mm <sup>3</sup>                  | 1213.138<br>(1201.329-1224.948)                     | 1212.102<br>(1200.259-1223.945) | 1216.287<br>(1204.402-1228.173) | 1208.391<br>(1196.573-1220.208) | 0.414                                     | 0.496                                                         | 0.376                |
| CA3, HV, mm <sup>3</sup>                  | 396.833<br>(391.981-401.685)                        | 398.355<br>(393.489-403.220)    | 399.159<br>(394.276-404.042)    | 396.336<br>(391.481-401.191)    | 0.430                                     | 0.469                                                         | 0.445                |
| CA4, HV, mm <sup>3</sup>                  | 478.075<br>(473.601-482.548)                        | 478.760<br>(474.274-483.246)    | 479.684<br>(475.182-484.187)    | 476.049<br>(471.573-480.526)    | 0.219                                     | 0.292                                                         | 0.221                |
| Subiculum, HV, mm <sup>3</sup>            | 839.210<br>(831.020-847.401)                        | 836.793<br>(828.579-845.006)    | 838.597<br>(830.354-846.840)    | 830.365<br>(822.169-838.561)    | 0.032*                                    | 0.076                                                         | 0.474                |
| Presubiculum, HV, mm <sup>3</sup>         | 560.163<br>(553.665-566.661)                        | 557.418<br>(550.902-563.934)    | 559.669<br>(553.130-556.209)    | 552.995<br>(546.493-559.497)    | 0.027*                                    | 0.081                                                         | 0.886                |
| Parasubiculum, HV, mm <sup>3</sup>        | 109.575<br>(107.190-111.961)                        | 109.156<br>(106.764-111.548)    | 109.495<br>(107.094-111.896)    | 108.893<br>(106.506-111.280)    | 0.887                                     | 0.887                                                         | 0.903                |
| Hippocampal tail, HV, mm <sup>3</sup>     | 1046.535<br>(1034.187-1058.883)                     | 1056.212<br>(1043.829-1068.595) | 1056.765<br>(1044.338-1069.192) | 1054.622<br>(1042.266-1066.979) | 0.145                                     | 0.248                                                         | 0.154                |

Abbreviations: *ApoE*  $\epsilon 4$ , apolipoprotein E  $\epsilon 4$ ; CA, Cornu Ammonis; eTIV, estimated intracranial volume; FDR, false discovery rate; GC ML DG, granule cell and molecular cell layer of the dentate gyrus; HATA, hippocampus amygdala transition area; HV, hippocampal volume.

Values are shown as multivariable-adjusted mean values (95% confidence intervals), where values are calculated as follows: (left + right) volumes of hippocampus or hippocampal subregions.

Adjusted for age, sex, educational level, research site, apolipoprotein E  $\epsilon 4$ , body mass index, hypertension, serum low-density lipoprotein cholesterol, serum high-density lipoprotein cholesterol, current smoking habits, current alcohol intakes, regular exercise, eTIV. \* p for trend < 0.05. <sup>†</sup> q-value of FDR correction < 0.05.  $\chi$  p for interaction < 0.05.

**Supplementary Table 18. Multivariable-adjusted mean values of the volumes of the hippocampus and hippocampal subfields with or without *ApoE*  $\epsilon 4$  according to homeostasis model assessment of  $\beta$  cell function (HOMA- $\beta$ ) levels**

|                                           | <i>ApoE</i> $\epsilon 4$ +, HOMA- $\beta$ levels |                                 | <i>ApoE</i> $\epsilon 4$ +<br>p for trend | <i>ApoE</i> $\epsilon 4$ +<br>q-value of FDR<br>correction |
|-------------------------------------------|--------------------------------------------------|---------------------------------|-------------------------------------------|------------------------------------------------------------|
|                                           | $\leq 30$<br>(n=51)                              | $> 30$<br>(n=499)               |                                           |                                                            |
| Whole hippocampus,<br>HV, mm <sup>3</sup> | 6162.191<br>(5945.217-6379.166)                  | 6178.053<br>(6004.535-6351.571) | 0.846                                     |                                                            |
| <b><i>Hippocampal subregions</i></b>      |                                                  |                                 |                                           |                                                            |
| HATA, HV, mm <sup>3</sup>                 | 93.990<br>(88.178-99.802)                        | 93.036<br>(88.388-97.684)       | 0.662                                     | 0.794                                                      |
| Fimbria, HV, mm <sup>3</sup>              | 100.307<br>(86.834-113.779)                      | 108.645<br>(97.871-119.419)     | 0.100                                     | 0.600                                                      |
| Hippocampal fissure, HV, mm <sup>3</sup>  | 341.256<br>(321.497-361.015)                     | 339.461<br>(323.659-355.262)    | 0.809                                     | 0.882                                                      |
| Molecular_layer, HV, mm <sup>3</sup>      | 867.292<br>(831.381-903.203)                     | 876.749<br>(848.030-905.467)    | 0.484                                     | 0.968                                                      |
| GC ML DG, HV, mm <sup>3</sup>             | 526.438<br>(505.232-547.644)                     | 535.272<br>(518.313-552.231)    | 0.268                                     | 0.804                                                      |
| CA1, HV, mm <sup>3</sup>                  | 1168.780<br>(1119.131-1218.429)                  | 1193.924<br>(1154.219-1233.629) | 0.178                                     | 0.712                                                      |
| CA3, HV, mm <sup>3</sup>                  | 387.889<br>(367.678-408.101)                     | 391.316<br>(375.153-407.479)    | 0.652                                     | 0.869                                                      |
| CA4, HV, mm <sup>3</sup>                  | 467.474<br>(448.998-485.950)                     | 472.377<br>(457.601-487.152)    | 0.480                                     | 1.152                                                      |
| Subiculum, HV, mm <sup>3</sup>            | 819.045<br>(784.101-853.990)                     | 825.068<br>(797.122-853.013)    | 0.647                                     | 0.970                                                      |
| Presubiculum, HV, mm <sup>3</sup>         | 547.546<br>(521.154-573.938)                     | 541.532<br>(520.426-562.639)    | 0.544                                     | 0.932                                                      |
| Parasubiculum, HV, mm <sup>3</sup>        | 106.316<br>(96.588-116.044)                      | 105.998<br>(98.218-113.777)     | 0.931                                     | 0.931                                                      |
| Hippocampal tail, HV, mm <sup>3</sup>     | 1077.114<br>(1019.782-1134.447)                  | 1034.138<br>(988.289-1079.988)  | 0.047*                                    | 0.564                                                      |

**(Continued) Supplementary Table 18. Multivariable-adjusted mean values of the volumes of the hippocampus and hippocampal subfields with or without *ApoE*  $\epsilon 4$  according to homeostasis model assessment of  $\beta$  cell function (HOMA- $\beta$ ) levels**

|                                           | <i>ApoE</i> $\epsilon 4$ -, HOMA- $\beta$ levels |                                 | <i>ApoE</i> $\epsilon 4$ –<br>p for trend | <i>ApoE</i> $\epsilon 4$ –<br>q-value of FDR<br>correction | p for interaction  |
|-------------------------------------------|--------------------------------------------------|---------------------------------|-------------------------------------------|------------------------------------------------------------|--------------------|
|                                           | $\leq 30$<br>(n=199)                             | $> 30$<br>(n=2,275)             |                                           |                                                            |                    |
| Whole hippocampus,<br>HV, mm <sup>3</sup> | 6123.140<br>(6014.841-6231.439)                  | 6222.850<br>(6139.005-6306.694) | 0.011*                                    | -                                                          | 0.479              |
| <b><i>Hippocampal subregions</i></b>      |                                                  |                                 |                                           |                                                            |                    |
| HATA, HV, mm <sup>3</sup>                 | 93.492<br>(90.358-96.625)                        | 95.876<br>(93.450-98.303)       | 0.035*                                    | 0.105                                                      | 0.228              |
| Fimbria, HV, mm <sup>3</sup>              | 101.711<br>(94.712-108.710)                      | 108.734<br>(103.315-114.152)    | 0.005*                                    | 0.030 <sup>†</sup>                                         | 0.899              |
| Hippocampal fissure, HV, mm <sup>3</sup>  | 340.858<br>(330.683-351.033)                     | 336.371<br>(328.494-344.248)    | 0.222                                     | 0.296                                                      | 0.578              |
| Molecular_layer, HV, mm <sup>3</sup>      | 871.864<br>(854.344-889.384)                     | 881.303<br>(867.740-894.867)    | 0.135                                     | 0.202                                                      | 0.718              |
| GC ML DG, HV, mm <sup>3</sup>             | 527.422<br>(516.581-538.263)                     | 535.821<br>(527.428-544.214)    | 0.032*                                    | 0.128                                                      | 0.915              |
| CA1, HV, mm <sup>3</sup>                  | 1190.310<br>(1164.533-1216.088)                  | 1200.974<br>(1181.017-1220.931) | 0.252                                     | 0.274                                                      | 0.368              |
| CA3, HV, mm <sup>3</sup>                  | 392.252<br>(381.765-402.739)                     | 396.753<br>(388.634-404.872)    | 0.234                                     | 0.280                                                      | 0.948              |
| CA4, HV, mm <sup>3</sup>                  | 465.245<br>(455.811-474.678)                     | 471.639<br>(464.336-478.943)    | 0.060                                     | 0.120                                                      | 0.906              |
| Subiculum, HV, mm <sup>3</sup>            | 815.262<br>(797.899-832.625)                     | 827.182<br>(813.739-840.624)    | 0.057                                     | 0.136                                                      | 0.913              |
| Presubiculum, HV, mm <sup>3</sup>         | 538.613<br>(524.919-552.307)                     | 546.200<br>(535.598-556.802)    | 0.125                                     | 0.214                                                      | 0.251              |
| Parasubiculum, HV, mm <sup>3</sup>        | 109.870<br>(104.768-114.972)                     | 109.575<br>(105.625-113.524)    | 0.873                                     | 0.873                                                      | 0.798              |
| Hippocampal tail, HV, mm <sup>3</sup>     | 1017.100<br>(989.576-1044.625)                   | 1048.793<br>(1027.484-1070.102) | 0.001*                                    | 0.012 <sup>†</sup>                                         | 0.003 <sup>‡</sup> |

Abbreviations: *ApoE*  $\epsilon 4$ , apolipoprotein E  $\epsilon 4$ ; CA, Cornu Ammonis; eTIV, estimated intracranial volume; FDR, false discovery rate; GC ML DG, granule cell and molecular cell layer of the dentate gyrus; HATA, hippocampus amygdala transition area; HOMA- $\beta$ , homeostasis model assessment of percent beta cell function; HV, hippocampal volume.

---

Values are shown as multivariable-adjusted mean values (95% confidence intervals), where values are calculated as follows: (left + right) volumes of hippocampus or hippocampal subregions.

Adjusted for age, sex, educational level, research site, apolipoprotein E  $\epsilon 4$ , body mass index, hypertension, serum low-density lipoprotein cholesterol, serum high-density lipoprotein cholesterol, current smoking habits, current alcohol intakes, regular exercise, eTIV. \* p for trend < 0.05. † q-value of FDR correction < 0.05.  $\chi$  p for interaction < 0.05.

**Supplementary Table 19. Multivariable-adjusted mean values of the volumes of the hippocampus and hippocampal subfields with or without *ApoE*  $\epsilon 4$  according to homeostasis model assessment of insulin resistance (HOMA-IR) levels**

|                                           | <i>ApoE</i> $\epsilon 4$ +, HOMA-IR levels, % |                                 |                                 | <i>ApoE</i> $\epsilon 4$ +<br>p for trend | <i>ApoE</i> $\epsilon 4$ +<br>q-value of FDR<br>correction |
|-------------------------------------------|-----------------------------------------------|---------------------------------|---------------------------------|-------------------------------------------|------------------------------------------------------------|
|                                           | <1.6<br>(n=408)                               | 1.6-2.4<br>(n=110)              | $\geq 2.5$<br>(n=32)            |                                           |                                                            |
| Whole hippocampus,<br>HV, mm <sup>3</sup> | 6185.408<br>(6013.206-6357.610)               | 6158.564<br>(5958.676-6358.453) | 6002.188<br>(5738.507-6265.868) | 0.236                                     | -                                                          |
| <b><i>Hippocampal subregions</i></b>      |                                               |                                 |                                 |                                           |                                                            |
| HATA, HV, mm <sup>3</sup>                 | 93.346<br>(88.727-97.965)                     | 93.176<br>(87.814-983538)       | 89.766<br>(82.693-96.838)       | 0.453                                     | 0.543                                                      |
| Fimbria, HV, mm <sup>3</sup>              | 107.061<br>(96.328-117.793)                   | 109.826<br>(97.368-122.284)     | 101.487<br>(85.053-117.921)     | 0.446                                     | 0.669                                                      |
| Hippocampal fissure, HV, mm <sup>3</sup>  | 340.279<br>(342.562-355.997)                  | 338.180<br>(319.935-356.425)    | 333.618<br>(309.550-357.686)    | 0.778                                     | 0.778                                                      |
| Molecular_layer, HV, mm <sup>3</sup>      | 875.772<br>(847.233-904.311)                  | 877.253<br>(844.125-910.380)    | 852.432<br>(808.733-896.131)    | 0.377                                     | 0.754                                                      |
| GC ML DG, HV, mm <sup>3</sup>             | 535.075<br>(518.228-551.921)                  | 530.133<br>(510.578-549.688)    | 517.037<br>(491.241-542.832)    | 0.215                                     | 0.860                                                      |
| CA1, HV, mm <sup>3</sup>                  | 1190.279<br>(1150.759-1229.798)               | 1193.229<br>(1147.356-1239.103) | 1161.818<br>(1101.305-1222.332) | 0.451                                     | 0.601                                                      |
| CA3, HV, mm <sup>3</sup>                  | 392.318<br>(376.277-408.358)                  | 383.992<br>(365.373-402.612)    | 379.063<br>(354.501-403.625)    | 0.217                                     | 0.651                                                      |
| CA4, HV, mm <sup>3</sup>                  | 472.979<br>(458.332-487.626)                  | 457.195<br>(450.193-484.197)    | 454.309<br>(431.881-476.737)    | 0.106                                     | 1.272                                                      |
| Subiculum, HV, mm <sup>3</sup>            | 825.311<br>(797.608-853.015)                  | 824.957<br>(792.800-857.115)    | 790.766<br>(748.346-833.186)    | 0.123                                     | 0.738                                                      |
| Presubiculum, HV, mm <sup>3</sup>         | 541.837<br>(520.860-562.814)                  | 549.165<br>(524.815-573.514)    | 534.165<br>(502.044-566.285)    | 0.429                                     | 0.735                                                      |
| Parasubiculum, HV, mm <sup>3</sup>        | 105.813<br>(98.076-113.550)                   | 107.806<br>(98.826-116.787)     | 105.007<br>(93.160-116.854)     | 0.723                                     | 0.788                                                      |
| Hippocampal tail, HV, mm <sup>3</sup>     | 1045.619<br>(999.931-1091.306)                | 1021.832<br>(968.799-1074.865)  | 1016.338<br>(946.380-1086.296)  | 0.278                                     | 0.667                                                      |

**(Continued) Supplementary Table 19. Multivariable-adjusted mean values of the volumes of the hippocampus and hippocampal subfields with or without *ApoE*  $\epsilon 4$  according to homeostasis model assessment of insulin resistance (HOMA-IR) levels**

|                                           | <i>ApoE</i> $\epsilon 4$ -, HOMA-IR levels, % |                                 |                                 | <i>ApoE</i> $\epsilon 4$ -<br>p for trend | <i>ApoE</i> $\epsilon 4$ -<br>q-value of FDR<br>correction | p for<br>interaction |
|-------------------------------------------|-----------------------------------------------|---------------------------------|---------------------------------|-------------------------------------------|------------------------------------------------------------|----------------------|
|                                           | <1.6<br>(n=554)                               | 1.6-2.4<br>(n=134)              | $\geq 2.5$<br>(n=53)            |                                           |                                                            |                      |
| Whole hippocampus,<br>HV, mm <sup>3</sup> | 6217.663<br>(6133.415-6301.910)               | 6188.357<br>(6090.931-6285.783) | 6197.078<br>(6080.013-6314.142) | 0.591                                     | -                                                          | 0.576                |
| <b><i>Hippocampal subregions</i></b>      |                                               |                                 |                                 |                                           |                                                            |                      |
| HATA, HV, mm <sup>3</sup>                 | 95.679<br>(93.242-98.116)                     | 94.950<br>(92.132-97.768)       | 96.174<br>(92.788-99.560)       | 0.581                                     | 1.394                                                      | 0.403                |
| Fimbria, HV, mm <sup>3</sup>              | 108.157<br>(102.710-113.604)                  | 107.642<br>(101.344-113.941)    | 107.272<br>(99.704-114.841)     | 0.936                                     | 1.248                                                      | 0.631                |
| Hippocampal fissure, HV, mm <sup>3</sup>  | 337.278<br>(329.370-345.185)                  | 335.793<br>(326.648-344.937)    | 333.442<br>(322.455-344.429)    | 0.635                                     | 1.270                                                      | 0.898                |
| Molecular_layer, HV, mm <sup>3</sup>      | 881.396<br>(867.781-895.010)                  | 874.630<br>(858.887-890.374)    | 877.498<br>(858.581-896.415)    | 0.353                                     | 1.412                                                      | 0.453                |
| GC ML DG, HV, mm <sup>3</sup>             | 535.106<br>(526.674-543.538)                  | 534.501<br>(524.750-544.252)    | 534.356<br>(522.640-546.073)    | 0.972                                     | 0.972                                                      | 0.768                |
| CA1, HV, mm <sup>3</sup>                  | 1200.650<br>(1180.623-1220.678)               | 1191.717<br>(1168.557-1214.878) | 1203.565<br>(1175.736-1231.394) | 0.371                                     | 1.113                                                      | 0.307                |
| CA3, HV, mm <sup>3</sup>                  | 396.225<br>(388.074-404.375)                  | 397.745<br>(388.320-407.171)    | 395.115<br>(383.790-406.441)    | 0.804                                     | 1.206                                                      | 0.711                |
| CA4, HV, mm <sup>3</sup>                  | 471.155<br>(463.819-478.490)                  | 470.473<br>(461.990-478.956)    | 470.119<br>(459.926-480.312)    | 0.945                                     | 1.030                                                      | 0.625                |
| Subiculum, HV, mm <sup>3</sup>            | 827.852<br>(814.363-841.340)                  | 819.676<br>(804.078-835.275)    | 815.283<br>(796.541-834.026)    | 0.089                                     | 1.068                                                      | 0.342                |
| Presubiculum, HV, mm <sup>3</sup>         | 546.454<br>(535.813-557.095)                  | 542.212<br>(529.907-554.518)    | 539.335<br>(524.550-554.121)    | 0.319                                     | 1.914                                                      | 0.473                |
| Parasubiculum, HV, mm <sup>3</sup>        | 109.784<br>(105.821-113.748)                  | 108.660<br>(104.076-113.244)    | 109.030<br>(103.522-114.538)    | 0.707                                     | 1.212                                                      | 0.775                |
| Hippocampal tail, HV, mm <sup>3</sup>     | 1045.206<br>(1023.774-1066.637)               | 1046.149<br>(1021.364-1070.933) | 1049.329<br>(1019.549-1079.110) | 0.939                                     | 1.126                                                      | 0.478                |

Abbreviations: *ApoE*  $\epsilon 4$ , apolipoprotein E  $\epsilon 4$ ; CA, Cornu Ammonis; eTIV, estimated intracranial volume; FDR, false discovery rate; GC ML DG, granule cell and molecular cell layer of the dentate gyrus; HATA, hippocampus amygdala transition area; HOMA-IR, homeostasis model assessment of insulin resistance; HV, hippocampal volume.

Values are shown as multivariable-adjusted mean values (95% confidence intervals), where values are calculated as follows: (left + right) volumes of hippocampus or hippocampal subregions.

---

Adjusted for age, sex, educational level, research site, apolipoprotein E  $\epsilon 4$ , body mass index, hypertension, serum low-density lipoprotein cholesterol, serum high-density lipoprotein cholesterol, current smoking habits, current alcohol intakes, regular exercise, eTIV. \* p for trend < 0.05. † q-value of FDR correction < 0.05.  $\chi$  p for interaction < 0.05.



**Supplementary Table 20. Multivariable-adjusted mean values of the volumes of the hippocampus and hippocampal subfields according to hemoglobinA<sub>1c</sub> levels in people with dementia, MCI and normal cognitive function**

|                                          | Hemoglobin A <sub>1c</sub> levels, % |                                 |                                 | p for trend | q-value of FDR correction |
|------------------------------------------|--------------------------------------|---------------------------------|---------------------------------|-------------|---------------------------|
|                                          | <5.7<br>(n=4,404)                    | 5.7-6.4<br>(n=3,740)            | ≥6.5<br>(n=1,050)               |             |                           |
| Whole hippocampus, HV, mm <sup>3</sup>   | 6056.946<br>(6023.050-6090.843)      | 6050.420<br>(6015.311-6085.530) | 5986.232<br>(5940.151-6032.314) | 0.002*      | -                         |
| <i>Hippocampal subregions</i>            |                                      |                                 |                                 |             |                           |
| HATA, HV, mm <sup>3</sup>                | 95.147<br>(94.198-96.095)            | 94.624<br>(93.642-95.606)       | 93.532<br>(92.243-94.821)       | 0.014*      | 0.033 <sup>†</sup>        |
| Fimbria, HV, mm <sup>3</sup>             | 96.875<br>(94.880-98.870)            | 94.547<br>(92.481-96.613)       | 88.972<br>(86.260-91.682)       | <0.001*     | <0.001 <sup>†</sup>       |
| Hippocampal fissure, HV, mm <sup>3</sup> | 342.056<br>(338.967-345.144)         | 344.135<br>(340.936-347.334)    | 345.251<br>(341.052-349.450)    | 0.097       | 0.116                     |
| Molecular_layer, HV, mm <sup>3</sup>     | 790.270<br>(784.955-795.586)         | 790.792<br>(785.286-796.297)    | 784.948<br>(777.721-792.174)    | 0.167       | 0.182                     |
| GC ML DG, HV, mm <sup>3</sup>            | 528.586<br>(525.114-532.058)         | 527.210<br>(523.614-530.806)    | 521.550<br>(516.829-526.270)    | 0.003*      | 0.009 <sup>†</sup>        |
| CA1, HV, mm <sup>3</sup>                 | 1187.535<br>(1179.730-1195.340)      | 1187.889<br>(1179.805-1195.974) | 1179.498<br>(1168.888-1190.109) | 0.171       | 0.171                     |
| CA3, HV, mm <sup>3</sup>                 | 388.390<br>(385.198-391.582)         | 389.292<br>(385.986-392.598)    | 385.001<br>(380.662-389.341)    | 0.076       | 0.114                     |
| CA4, HV, mm <sup>3</sup>                 | 467.782<br>(464.732-470.832)         | 467.273<br>(464.114-470.432)    | 463.607<br>(459.460-467.753)    | 0.066       | 0.113                     |
| Subiculum, HV, mm <sup>3</sup>           | 817.256<br>(811.657-822.855)         | 813.954<br>(808.155-819.754)    | 802.947<br>(795.335-810.559)    | <0.001*     | <0.001 <sup>†</sup>       |
| Presubiculum, HV, mm <sup>3</sup>        | 547.443<br>(543.094-551.793)         | 543.805<br>(539.299-548.310)    | 535.647<br>(529.734-541.560)    | <0.001*     | <0.001 <sup>†</sup>       |
| Parasubiculum, HV, mm <sup>3</sup>       | 108.323<br>(106.756-109.891)         | 107.091<br>(105.468-108.715)    | 107.057<br>(104.926-109.188)    | 0.091       | 0.121                     |
| Hippocampal tail, HV, mm <sup>3</sup>    | 1029.339<br>(1021.220-1037.458)      | 1033.943<br>(1025.533-1042.352) | 1023.473<br>(1012.453-1034.510) | 0.065       | 0.130                     |

Abbreviations: CA, Cornu Ammonis; eTIV, estimated intracranial volume; FDR, false discovery rate; GC ML DG, granule cell and molecular cell layer of the dentate gyrus; HATA, hippocampus amygdala transition area; HV, hippocampal volume; MCI, mild cognitive impairment.

Values are shown as multivariable-adjusted mean values (95% confidence intervals), where values are calculated as follows: (left + right) volumes of hippocampus or hippocampal subregions.

Adjusted for age, sex, educational level, research site, apolipoprotein E  $\epsilon 4$ , body mass index, hypertension, serum low-density lipoprotein cholesterol, serum high-

---

density lipoprotein cholesterol, current smoking habits, current alcohol intakes, regular exercise, eTIV. \* p for trend < 0.05. † q-value of FDR correction < 0.05.

**Supplementary Table 21. Multivariable-adjusted mean values of the volumes of the hippocampus and hippocampal subfields according to serum glycated albumin levels in people with dementia, MCI and normal cognitive function**

|                                          | Serum glycoalbumin levels, %    |                                 |                                 |                                 | p for trend | q-value of FDR correction |
|------------------------------------------|---------------------------------|---------------------------------|---------------------------------|---------------------------------|-------------|---------------------------|
|                                          | <13.9<br>(n=2,083)              | 13.9-14.8<br>(n=2,258)          | 14.9-16.0<br>(n=2,284)          | ≥16.1<br>(n=2,374)              |             |                           |
| Whole hippocampus, HV, mm <sup>3</sup>   | 6056.398<br>(6017.755-6095.040) | 6061.151<br>(6022.986-6099.316) | 6073.036<br>(6034.689-6111.384) | 5992.818<br>(5955.083-6030.553) | <0.001*     | -                         |
| <i>Hippocampal subregions</i>            |                                 |                                 |                                 |                                 |             |                           |
| HATA, HV, mm <sup>3</sup>                | 95.288<br>(94.209-96.367)       | 95.065<br>(93.999-96.131)       | 95.289<br>(94.218-96.360)       | 93.655<br>(92.601-94.709)       | 0.001*      | 0.002 <sup>†</sup>        |
| Fimbria, HV, mm <sup>3</sup>             | 98.092<br>(95.823-100.360)      | 97.092<br>(94.955-99.436)       | 96.470<br>(94.219-98.721)       | 89.499<br>(87.284-91.714)       | <0.001*     | <0.001 <sup>†</sup>       |
| Hippocampal fissure, HV, mm <sup>3</sup> | 340.416<br>(336.908-343.924)    | 341.191<br>(337.727-344.655)    | 344.420<br>(340.939-347.901)    | 344.202<br>(340.776-347.627)    | 0.021*      | 0.025 <sup>†</sup>        |
| Molecular_layer, HV, mm <sup>3</sup>     | 792.533<br>(786.470-798.595)    | 792.822<br>(786.835-798.810)    | 789.945<br>(783.929-795.961)    | 784.116<br>(778.196-790.036)    | 0.004*      | 0.006 <sup>†</sup>        |
| GC ML DG, HV, mm <sup>3</sup>            | 528.976<br>(525.021-532.932)    | 529.173<br>(525.266-533.080)    | 530.174<br>(526.249-534.100)    | 520.911<br>(517.048-524.774)    | <0.001*     | <0.001 <sup>†</sup>       |
| CA1, HV, mm <sup>3</sup>                 | 1189.278<br>(1180.371-1198.185) | 1187.159<br>(1178.363-1195.956) | 1191.820<br>(1182.982-1200.659) | 1178.117<br>(1169.420-1186.815) | 0.003*      | 0.005 <sup>†</sup>        |
| CA3, HV, mm <sup>3</sup>                 | 388.004<br>(384.366-391.642)    | 389.688<br>(386.095-393.282)    | 390.643<br>(387.033-394.254)    | 385.231<br>(381.678-388.784)    | 0.004*      | 0.006 <sup>†</sup>        |
| CA4, HV, mm <sup>3</sup>                 | 467.397<br>(463.921-470.873)    | 468.325<br>(464.892-471.758)    | 469.658<br>(466.208-473.107)    | 462.782<br>(459.388-466.176)    | 0.001       | 0.002 <sup>†</sup>        |
| Subiculum, HV, mm <sup>3</sup>           | 817.188<br>(810.798-823.578)    | 816.517<br>(810.206-822.827)    | 817.579<br>(811.238-823.920)    | 804.942<br>(798.702-811.182)    | <0.001*     | <0.001 <sup>†</sup>       |
| Presubiculum, HV, mm <sup>3</sup>        | 547.403<br>(542.442-552.364)    | 545.780<br>(540.880-550.680)    | 547.008<br>(542.085-551.931)    | 538.076<br>(533.232-542.921)    | <0.001*     | <0.001 <sup>†</sup>       |
| Parasubiculum, HV, mm <sup>3</sup>       | 108.104<br>(106.319-109.889)    | 107.789<br>(106.025-109.552)    | 108.031<br>(106.259-109.803)    | 106.800<br>(105.057-108.544)    | 0.330       | 0.233                     |
| Hippocampal tail, HV, mm <sup>3</sup>    | 1024.134<br>(1014.878-1033.390) | 1031.638<br>(1022.496-1040.779) | 1036.418<br>(1027.233-1045.604) | 1028.688<br>(1019.649-1037.726) | 0.027*      | 0.029 <sup>†</sup>        |

Abbreviations: CA, Cornu Ammonis; eTIV, estimated intracranial volume; FDR, false discovery rate; GC ML DG, granule cell and molecular cell layer of the dentate gyrus; HATA, hippocampus amygdala transition area; HV, hippocampal volume; MCI, mild cognitive impairment.

Values are shown as multivariable-adjusted mean values (95% confidence intervals), where values are calculated as follows: (left + right) volumes of hippocampus or hippocampal subregions.

Adjusted for age, sex, educational level, research site, apolipoprotein E  $\epsilon 4$ , body mass index, hypertension, serum low-density lipoprotein cholesterol, serum high-density

---

lipoprotein cholesterol, current smoking habits, current alcohol intakes, regular exercise, eTIV. \* p for trend < 0.05. † q-value of FDR correction < 0.05.

**Supplementary Table 22. Multivariable-adjusted mean values of the volumes of the hippocampus and hippocampal subfields according to homeostasis model assessment of  $\beta$  cell function (HOMA- $\beta$ ) levels in people with dementia, MCI and normal cognitive function**

|                                          | HOMA- $\beta$ levels         |                              | p value | q-value of FDR correction |
|------------------------------------------|------------------------------|------------------------------|---------|---------------------------|
|                                          | $\leq 30$<br>(n=313)         | $> 30$<br>(n=3,321)          |         |                           |
| Whole hippocampus, HV, mm <sup>3</sup>   | 6014.941 (6167.114-6167.114) | 6043.407 (5958.247-6128.566) | 0.070   | -                         |
| <b><i>Hippocampal subregions</i></b>     |                              |                              |         |                           |
| HATA, HV, mm <sup>3</sup>                | 93.987 (91.643-96.331)       | 95.693 (93.982-97.405)       | 0.068   | 0.204                     |
| Fimbria, HV, mm <sup>3</sup>             | 97.155 (91.977-102.333)      | 104.000 (100.220-107.781)    | <0.001* | 0.011 <sup>†</sup>        |
| Hippocampal fissure, HV, mm <sup>3</sup> | 339.327 (331.630-347.025)    | 333.173 (327.554-338.793)    | 0.045*  | 0.270                     |
| Molecular_layer, HV, mm <sup>3</sup>     | 856.053 (842.557-869.548)    | 865.300 (855.447-875.153)    | 0.086   | 0.206                     |
| GC ML DG, HV, mm <sup>3</sup>            | 519.308 (510.872-527.744)    | 525.676 (519.517-531.835)    | 0.059   | 0.236                     |
| CA1, HV, mm <sup>3</sup>                 | 1169.985 (1150.366-1189.604) | 1178.213 (1163.890-1192.536) | 0.294   | 0.441                     |
| CA3, HV, mm <sup>3</sup>                 | 384.113 (376.163-392.062)    | 387.191 (381.388-392.995)    | 0.332   | 0.398                     |
| CA4, HV, mm <sup>3</sup>                 | 458.919 (451.546-466.292)    | 462.836 (457.453-468.218)    | 0.183   | 0.313                     |
| Subiculum, HV, mm <sup>3</sup>           | 807.711 (797.697-817.724)    | 802.319 (788.603-816.035)    | 0.325   | 0.433                     |
| Presubiculum, HV, mm <sup>3</sup>        | 537.695 (527.208-548.183)    | 540.986 (533.329-548.643)    | 0.432   | 0.471                     |
| Parasubiculum, HV, mm <sup>3</sup>       | 110.894 (108.119-113.668)    | 110.678 (106.878-114.478)    | 0.887   | 0.887                     |
| Hippocampal tail, HV, mm <sup>3</sup>    | 1013.194 (992.205-1034.184)  | 1026.441 (1011.117-1041.764) | 0.114   | 0.228                     |

Abbreviations: CA, Cornu Ammonis; eTIV, estimated intracranial volume; FDR, false discovery rate; GC ML DG, granule cell and molecular cell layer of the dentate gyrus; HATA, hippocampus amygdala transition area; HOMA- $\beta$ , homeostasis model assessment of beta cell function; HV, hippocampal volume; MCI, mild cognitive impairment.

Values are shown as multivariable-adjusted mean values (95% confidence intervals), where values are calculated as follows: (left + right) volumes of hippocampus or hippocampal subregions.

Adjusted for age, sex, educational level, research site, apolipoprotein E  $\epsilon 4$ , body mass index, hypertension, serum low-density lipoprotein cholesterol, serum high-density lipoprotein cholesterol, current smoking habits, current alcohol intakes, regular exercise, eTIV. \* p for trend < 0.05. <sup>†</sup> q-value of FDR correction < 0.05.

**Supplementary Table 23. Multivariable-adjusted mean values of the volumes of the hippocampus and hippocampal subfields according to homeostasis model assessment of insulin resistance (HOMA-IR) levels in people with dementia, MCI and normal cognitive function**

|                                          | HOMA-IR levels, %               |                                 |                                 | p for trend | q-value of FDR correction |
|------------------------------------------|---------------------------------|---------------------------------|---------------------------------|-------------|---------------------------|
|                                          | <1.6<br>(n=2,767)               | 1.6-2.4<br>(n=637)              | ≥2.5<br>(n=230)                 |             |                           |
| Whole hippocampus, HV, mm <sup>3</sup>   | 6204.847<br>(6128.106-6281.588) | 6175.624<br>(6087.439-6281.588) | 6159.157<br>(6051.619-6266.695) | 0.378       | -                         |
| <b><i>Hippocampal subregions</i></b>     |                                 |                                 |                                 |             |                           |
| HATA, HV, mm <sup>3</sup>                | 95.357<br>(93.166-97.547)       | 94.692<br>(92.175-97.209)       | 94.981<br>(91.911-98.050)       | 0.673       | 1.00                      |
| Fimbria, HV, mm <sup>3</sup>             | 107.462<br>(102.530-112.395)    | 107.443<br>(101.775-113.111)    | 105.801<br>(98.889-112.713)     | 0.821       | 0.985                     |
| Hippocampal fissure, HV, mm <sup>3</sup> | 338.230<br>(331.071-345.390)    | 336.653<br>(328.426-344.880)    | 334.242<br>(324.209-344.275)    | 0.549       | 1.098                     |
| Molecular_layer, HV, mm <sup>3</sup>     | 880.071<br>(867.609-892.532)    | 874.931<br>(860.610-889.251)    | 873.615<br>(856.152-891.078)    | 0.386       | 2.316                     |
| GC ML DG, HV, mm <sup>3</sup>            | 534.773<br>(527.124-542.421)    | 533.070<br>(524.281-541.860)    | 530.922<br>(520.204-541.640)    | 0.595       | 1.020                     |
| CA1, HV, mm <sup>3</sup>                 | 1197.294<br>(1179.159-1215.429) | 1190.461<br>(1169.622-1211.301) | 1195.738<br>(1170.325-1221.151) | 0.545       | 1.308                     |
| CA3, HV, mm <sup>3</sup>                 | 395.261<br>(387.885-402.636)    | 394.583<br>(386.108-403.058)    | 391.951<br>(381.616-402.286)    | 0.714       | 0.952                     |
| CA4, HV, mm <sup>3</sup>                 | 471.167<br>(464.517-477.818)    | 469.318<br>(461.675-476.960)    | 467.052<br>(457.732-476.371)    | 0.453       | 1.359                     |
| Subiculum, HV, mm <sup>3</sup>           | 825.931<br>(813.633-838.228)    | 819.421<br>(805.289-833.553)    | 810.004<br>(792.771-827.237)    | 0.037*      | 0.444                     |
| Presubiculum, HV, mm <sup>3</sup>        | 546.029<br>(536.393-555.666)    | 544.127<br>(533.053-555.201)    | 539.109<br>(525.605-552.614)    | 0.410       | 1.640                     |
| Parasubiculum, HV, mm <sup>3</sup>       | 109.213<br>(105.632-112.794)    | 108.617<br>(104.502-112.732)    | 108.321<br>(103.303-113.340)    | 0.837       | 0.913                     |
| Hippocampal tail, HV, mm <sup>3</sup>    | 1042.290<br>(1022.628-1061.953) | 1038.961<br>(1016.366-1061.556) | 1041.664<br>(1014.110-1069.218) | 0.884       | 0.884                     |

Abbreviations: CA, Cornu Ammonis; eTIV, estimated intracranial volume; FDR, false discovery rate; GC ML DG, granule cell and molecular cell layer of the dentate gyrus; HATA, hippocampus amygdala transition area; HOMA-IR, homeostasis model assessment of insulin resistance; HV, hippocampal volume; MCI, mild cognitive impairment.

Values are shown as multivariable-adjusted mean values (95% confidence intervals), where values are calculated as follows: (left + right) volumes of hippocampus

---

or hippocampal subregions.

Adjusted for age, sex, educational level, research site, apolipoprotein E  $\epsilon 4$ , body mass index, hypertension, serum low-density lipoprotein cholesterol, serum high-density lipoprotein cholesterol, current smoking habits, current alcohol intakes, regular exercise, eTIV. \* p for trend < 0.05. † q-value of FDR correction < 0.05.
